# Supplementary material for: Proton Pump Inhibitor Use and Risk of Serious Infections in Young Children
Source: PubMed Central journal article supplement (PMC10425862; doi:10.1001/jamapediatrics.2023.2900), 2023-08-14
Supplement: jamapediatr-e232900-s001.pdf [file jamapediatr-e232900-s001.pdf]

## Supplemental Online Content

Lassalle M, Zureik M, Dray-Spira R. Proton pump inhibitor use and risk of serious infections in young children. *JAMA Pediatr*. Published online August 14, 2023.  
doi:10.1001/jamapediatrics.2023.2900

**eMethods.** Presentation of the SNDS databases

### eReferences

**eFigure 1.** PPI use over time defined as time-varying according to exposure status: examples

**eFigure 2.** PPI use over time defined as time-varying according to history of exposure: examples

**eFigure 3.** PPI use over time defined as time-varying according to duration of any ongoing exposure: examples

**eTable 1.** List of ICD-10 codes used to identify serious infections

**eTable 2.** List of codes used to identify maternal comorbidities

**eTable 3.** List of codes used to identify child comorbidities and drug exposures

**eTable 4.** List of ICD-10 codes used to identify traumatic injuries, excluding fractures

**eTable 5.** Description of the study population at baseline

**eTable 6.** Overall risk of serious infections associated with covariates

**eTable 7.** Overall risk of serious infections associated with history of PPI exposure over time in children, distinguishing past PPI users according to time since PPI treatment withdrawal

**eTable 8.** Overall risk of serious infections associated with proton pump inhibitor exposure over time in children, separately in children born very/extremely preterm or with a chronic comorbidity<sup>a</sup>, and in those without any of these conditions at baseline

**eTable 9.** Overall risk of serious infections associated with PPI exposure over time in children, excluding H2RA users at baseline

**eTable 10.** Risk of serious infections associated with proton pump inhibitor exposure over time in children, overall, by site and pathogen – Assessment of protopathic bias

**eTable 11.** Risk of serious lower respiratory tract infections in the 30 days before index date according to the treatment initiated at index date (PPI vs. H2RA or antacid/alginate)

**eTable 12.** E-values calculated for the association between PPI exposure over time and serious infections in children, overall, and by site and pathogen

This supplemental material has been provided by the authors to give readers additional information about their work.

## eMethods. Presentation of the SNDS databases

The French National Health Data System (Système National des Données de Santé, SNDS) records detailed information on individual health insurance claims for inpatient and outpatient care, from both the SNIIRAM (Système National d'Information Inter-Régime de l'Assurance Maladie, National Health Insurance claims information system) and the PMSI (Programme de Médicalisation des Systèmes d'Information, national hospital discharge database).

The database contains data on all outpatient services reimbursed by the National Health Insurance, including drugs (coded according to the Anatomical Therapeutic Chemical Classification System [ATC]<sup>1</sup>), physician visits, and laboratory tests, but does not provide information on medical indications, which can be deduced from other data. Patients with costly chronic diseases (LTD: long-term diseases), such as cancer, are 100% reimbursed for their health expenditure, and the diagnosis is recorded (coded according to the International Classification of Diseases, Tenth Revision [ICD-10]<sup>2</sup>).

The database also contains the procedures performed during all hospital stays, and the principal (DP), related (DR), and associated (DA) diagnoses (coded according to ICD-10). The DP corresponds to the diseases justifying admission to hospital. In order to be recorded as a hospitalization diagnosis in the database (DP, DR, or DA), the diagnosis therefore had to have an impact on medical care. Procedures are coded according to the French medical classification of clinical procedures (CCAM, Classification commune des actes médicaux<sup>3</sup>). Drugs used during hospital stays are not available, except for certain expensive drugs (such as some types of cancer chemotherapy). Data available for hospital stays are admission date, discharge date, and procedure date.

About 99% of the population living in France (67 million people) are covered by one of the various national health insurance scheme. Each national health insurance scheme reimburses almost all medical care at the same rate for both public and private care. Persons with limited income or LTD are 100% reimbursed.

SNDS data are commonly used for non-interventional studies in various conditions. More than 400 published studies have used these databases<sup>4</sup>. These comprehensive national databases are powerful tools for assessing the prevalence of rare events. As the primary purpose of these databases is financial, any false statements constitute serious frauds, liable to legal proceedings, which also tends to ensure the accuracy of the data recorded. Furthermore, quality controls and audits are performed before transmission to National Health Insurance (CNAM, Caisse Nationale de l'Assurance Maladie), mainly for processing of aberrant or missing data.

## eReferences

1. WHO Collaborating Centre for Drug Statistics Methodology. WHOCC - ATC/DDD Index. Accessed March 12, 2021. [https://www.whocc.no/atc\\_ddd\\_index/](https://www.whocc.no/atc_ddd_index/)
2. World Health Organization. *The ICD-10 Classification of Mental and Behavioural Disorders: Clinical Descriptions and Diagnostic Guidelines*. World Health Organization; 1992.
3. Ministère de la Santé, de la Jeunesse et des Sports. Classification commune des actes médicaux. Bull Off. 2007;(2007/3 bis). Accessed March 12, 2021. <https://solidarites-sante.gouv.fr/IMG/pdf/bo0703.pdf>
4. Tuppin P, Rudant J, Constantinou P, et al. Value of a national administrative database to guide public decisions: From the système national d'information interrégimes de l'Assurance Maladie (SNIIRAM) to the système national des données de santé (SNDS) in France. *Rev Epidemiol Sante Publique*. 2017;65 Suppl 4:S149-S167. doi:10.1016/j.respe.2017.05.004

eFigures

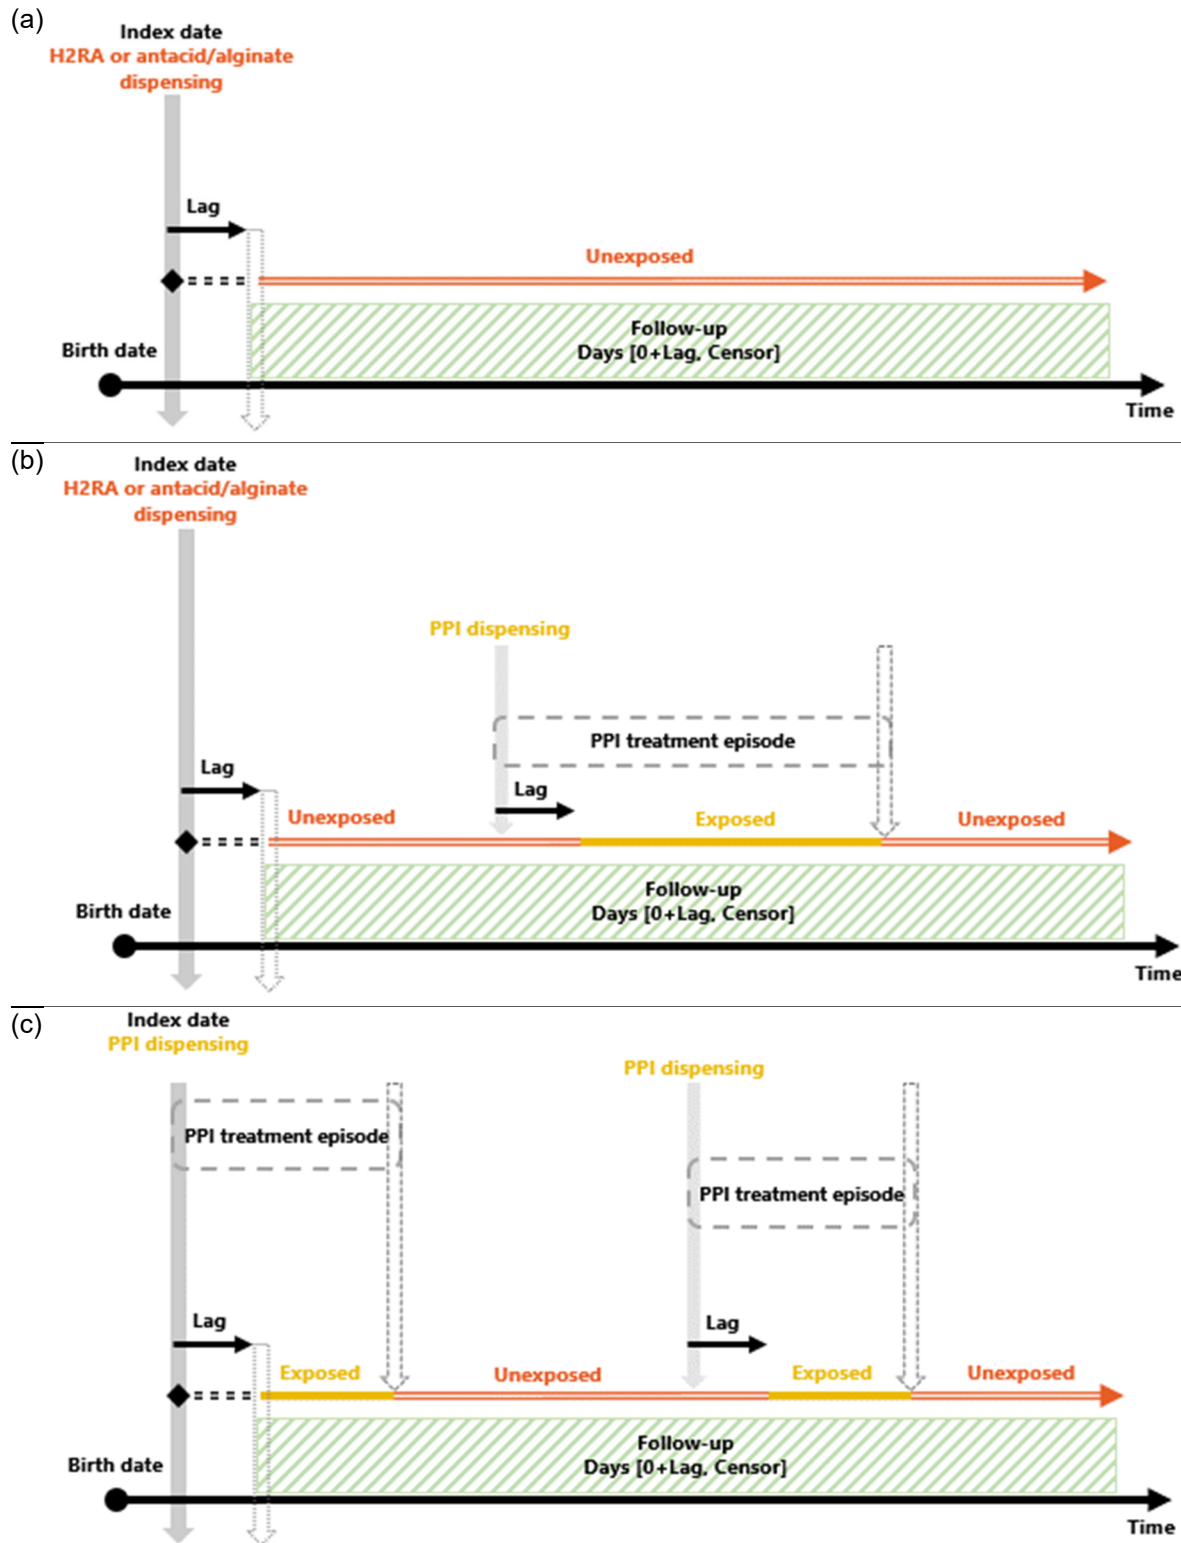

eFigure 1. PPI use over time defined as time-varying according to exposure status – Examples

### eFigure 1

Index date: first dispensing of a drug treatment for reflux or other gastric acid-related disorders, namely proton pump inhibitor (PPI), histamine-2-receptor antagonist (H2RA), or antacid/alginate.

PPI treatment episode: one or several PPI dispensings, with (at most) 90-day gaps between two consecutive dispensings.

Follow-up: children were followed from the index date (day 0)+lag until occurrence of serious infection, loss to follow-up (censored 1 year after the last identified date of outpatient care), death, or December 31, 2019, whichever came first.

(a) In this example, the child was dispensed an H2RA or antacid/alginate at index date, and did not receive any PPI dispensing during follow-up. Thus, she/he exclusively contributed as unexposed person-time.

(b) In this example, the child was dispensed an H2RA or antacid/alginate at index date, then dispensed PPI in a single PPI treatment episode during follow-up. Thus, she/he contributed successively as: unexposed person-time (from the start of the follow-up to the start of PPI treatment episode+lag), exposed person-time (from the start of PPI treatment episode+lag to the end of PPI treatment episode), then unexposed person-time (from the end of PPI treatment episode to the end of follow-up).

(c) In this example, the child was dispensed a PPI at index date. In total, during follow-up, she/he received two PPI treatment episodes. Thus, she/he contributed successively as exposed person-time, unexposed person-time, exposed person-time, then unexposed person-time.

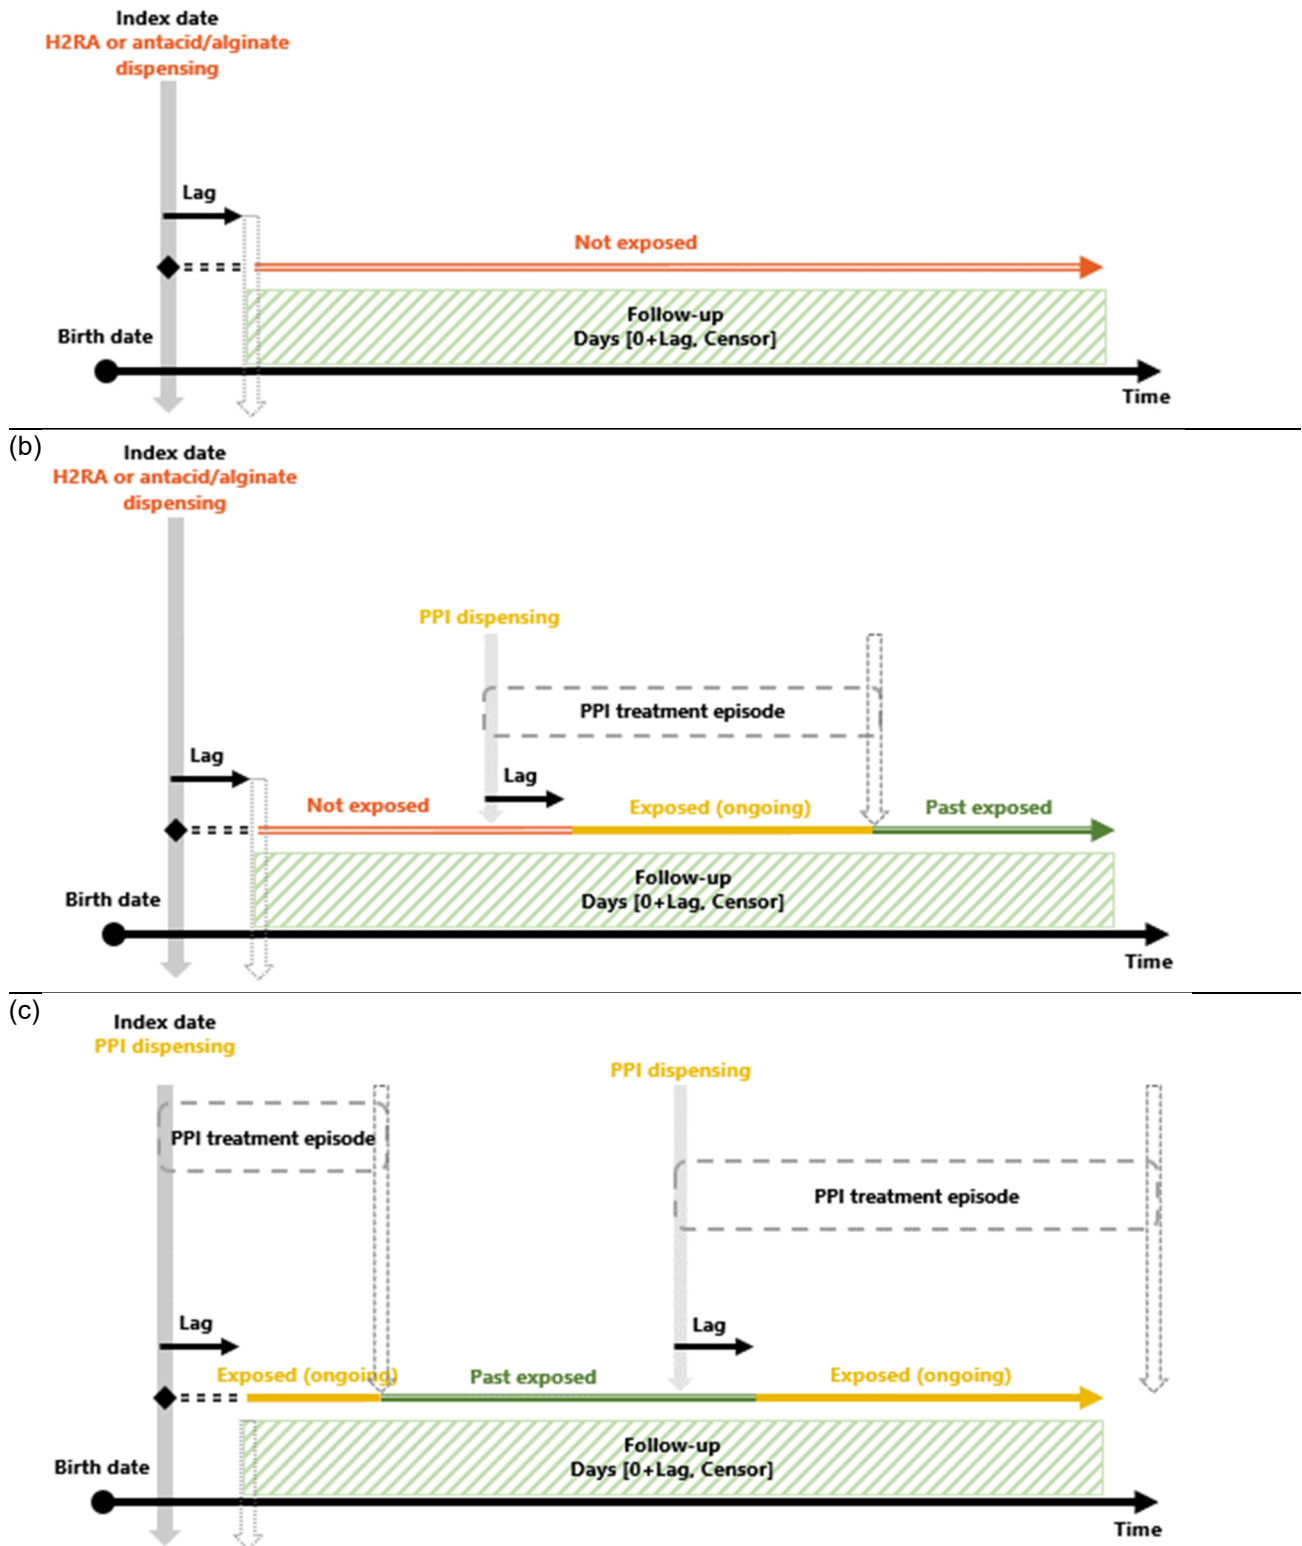

eFigure 2. PPI use over time defined as time-varying according to history of exposure – Examples

## eFigure 2

Index date: first dispensing of a drug treatment for reflux or other gastric acid-related disorders, namely proton pump inhibitor (PPI), histamine-2-receptor antagonist ([H2RA], or antacid/alginate.

PPI treatment episode: one or several PPI dispensings, with (at most) 90-day gaps between two consecutive dispensings.

Follow-up: Children were followed from the index date (day 0)+lag until occurrence of serious infection, loss to follow-up (censored 1 year after the last identified date of outpatient care), death, or December 31, 2019, whichever came first.

(a) In this example, the child was dispensed an H2RA or antacid/alginate at index date, and did not receive any PPI dispensing during follow-up. Thus, she/he exclusively contributed as not exposed person-time.

(b) In this example, the child was dispensed an H2RA or antacid/alginate at index date, then dispensed PPI in a single PPI treatment episode during follow-up. Thus, she/he contributed successively as: not exposed person-time (from the start of the follow-up to the start of PPI treatment episode+lag), ongoing exposed person-time (from the start of PPI treatment episode+lag to the end of PPI treatment episode), then past exposed person-time (from the end of PPI treatment episode to the end of follow-up).

(c) In this example, the child was dispensed a PPI at index date. In total, during follow-up, he/she received two PPI treatment episodes. Thus, she/he contributed successively as ongoing exposed person-time, past exposed person-time, then ongoing exposed person-time.

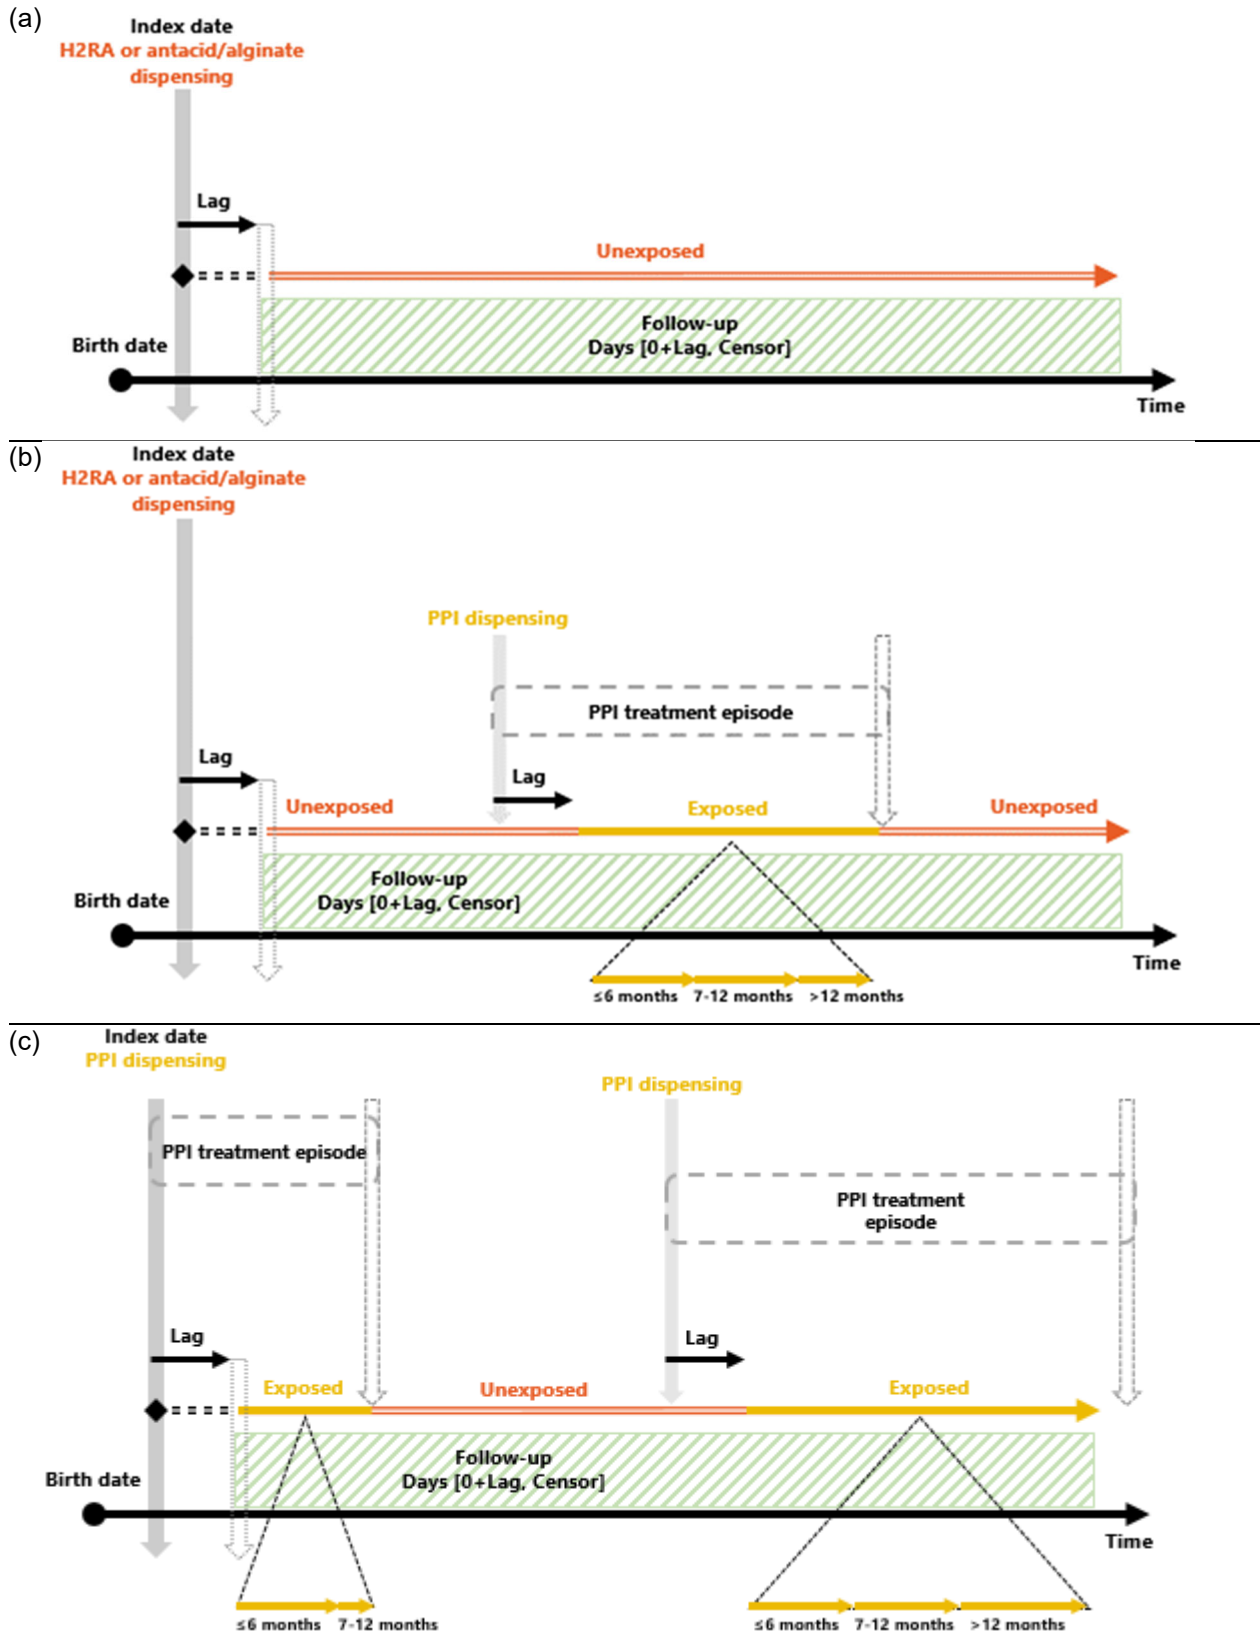

eFigure 3. PPI use over time defined as time-varying according to duration of any ongoing exposure – Examples

### eFigure 3

Index date: first dispensing of a drug treatment for reflux or other gastric acid-related disorders, namely proton pump inhibitor (PPI), histamine-2-receptor antagonist ([H2RA], or antacid/alginate.

PPI treatment episode: one or several PPI dispensings, with (at most) 90-day gaps between two consecutive dispensings.

Follow-up: Children were followed from the index date (day 0)+lag until occurrence of serious infection, loss to follow-up (censored 1 year after the last identified date of outpatient care), death, or December 31, 2019, whichever came first.

(a) In this example, the child was dispensed an H2RA or antacid/alginate at index date, and did not receive any PPI dispensing during follow-up. Thus, she/he exclusively contributed as unexposed person-time.

(b) In this example, the child was dispensed an H2RA or antacid/alginate at index date, then dispensed PPI in a single PPI treatment episode lasting above 12 months during follow-up. Thus, she/he contributed successively as: unexposed person-time (from the start of the follow-up to the start of PPI treatment episode+lag),  $\leq 6$  months exposed person-time (from the start of PPI treatment episode+lag to the end of the 6<sup>th</sup> month of PPI treatment episode), 7-12 months exposed person-time (from the end of the 6<sup>th</sup> month of PPI treatment episode to the end of the 12<sup>th</sup> month of the end of PPI treatment episode), >12 months exposed person-time (from the end of the 12<sup>th</sup> month of PPI treatment episode to the end of PPI treatment episode), then unexposed person-time (from the end of PPI treatment episode to the end of follow-up).

(c) In this example, the child was dispensed a PPI at index date. In total, during follow-up, he/she received two PPI treatment episodes, the first one lasting above 6 months and less than 12 months, the second one lasting more than 12 months. Thus, she/he contributed successively as  $\leq 6$  months exposed person-time, unexposed person-time,  $\leq 6$  months exposed person-time, 7-12 months exposed person-time, then >12 months exposed person-time until the end of follow-up.



## eTables

**eTable 1. List of ICD-10 codes used to identify serious infections**

| Infection site                                                       |                                                                                     |
|----------------------------------------------------------------------|-------------------------------------------------------------------------------------|
| <b>Digestive tract</b>                                               |                                                                                     |
| Gastrointestinal and oesophageal infections                          | A00–A08, A090, K2380, K93820                                                        |
| Viral hepatitis                                                      | B15–B19, B251                                                                       |
| Liver abscess                                                        | K750                                                                                |
| Cholangitis                                                          | K800, K801, K803, K804, K810, K830, K8700                                           |
| <b>ENT sphere</b>                                                    |                                                                                     |
| Mastoiditis                                                          | H70, H750                                                                           |
| Nasopharyngitis                                                      | A361                                                                                |
| Rhinitis                                                             | J00                                                                                 |
| Sinusitis                                                            | J01                                                                                 |
| Pharyngitis                                                          | J02                                                                                 |
| Pharyngeal, retropharyngeal, and parapharyngeal abscess              | J36, J390, J391                                                                     |
| Tonsillitis                                                          | A360, J03                                                                           |
| Laryngitis and epiglottitis                                          | A362, J05                                                                           |
| Acute upper respiratory infections of multiple and unspecified sites | A368, A369, J06                                                                     |
| Infection of external ear and acute otitis media                     | H600–H603, H620–H623, H651, H66, H670, H671, H680                                   |
| <b>Lower respiratory tract</b>                                       |                                                                                     |
| Pneumonia                                                            | A481, B012, B052, B250, J09–J18                                                     |
| Lung abscess                                                         | J85                                                                                 |
| Pleural empyema                                                      | J86                                                                                 |
| Other acute lower respiratory infections                             | A37, A420, B39, B40, B44, B583, B59, B953, J20–J22, U04                             |
| <b>Kidneys or urinary tract</b>                                      |                                                                                     |
| Acute pyelonephritis                                                 | N10, N136                                                                           |
| Acute cystitis                                                       | N300                                                                                |
| Urinary tract infection of unspecified site                          | N390                                                                                |
| <b>Skin</b>                                                          |                                                                                     |
| Erysipelas                                                           | A46                                                                                 |
| Dermatophytosis and other superficial mycoses                        | B35, B36, B372, B379                                                                |
| Cellulitis and abscess                                               | J340, L02, L03                                                                      |
| Other local infections of skin, oral tissue, and subcutaneous tissue | L00, L01, L04, L05, L08, L303, M726                                                 |
| <b>Musculoskeletal system</b>                                        |                                                                                     |
|                                                                      | M00, M01, M463, M462, M465, M491–M493, M600, M630–M632, M650, M651, M86, M901, M902 |
| <b>Nervous system</b>                                                |                                                                                     |
| Viral meningitis                                                     | A87, B003, B010, B021, B051, G020                                                   |
| Bacterial meningitis                                                 | A321, A39, G00, G01                                                                 |
| Encephalitis and other neurological infections                       | A80–A89, B004, B011, B020, B022, B050, B060, G021, G028, G04–G07                    |
| <b>Others</b>                                                        |                                                                                     |
| Eye infections                                                       | B005, B30, B580, H000, H010, H030–H031, H061, H105,                                 |

|                                                                                              |                                                                                                                                                                                                                                                                                                                                                                                                                                                                                                                                                                                                                                     |
|----------------------------------------------------------------------------------------------|-------------------------------------------------------------------------------------------------------------------------------------------------------------------------------------------------------------------------------------------------------------------------------------------------------------------------------------------------------------------------------------------------------------------------------------------------------------------------------------------------------------------------------------------------------------------------------------------------------------------------------------|
|                                                                                              | H130, H131, H191, H192, H220                                                                                                                                                                                                                                                                                                                                                                                                                                                                                                                                                                                                        |
| Infections of prosthetic devices, implants, and grafts                                       | T826, T827, T845–T847, T857                                                                                                                                                                                                                                                                                                                                                                                                                                                                                                                                                                                                         |
| Acute infective pericarditis, myocarditis, and endocarditis                                  | I301, I320, I321, I330, I400, I410–I412, I520, I521                                                                                                                                                                                                                                                                                                                                                                                                                                                                                                                                                                                 |
| Sepsis, systemic inflammatory response syndrome (SIRS) of infectious origin and septic shock | A327, A40, A41, R572, R650, R651                                                                                                                                                                                                                                                                                                                                                                                                                                                                                                                                                                                                    |
| Unspecified infectious diseases                                                              | B99                                                                                                                                                                                                                                                                                                                                                                                                                                                                                                                                                                                                                                 |
|                                                                                              |                                                                                                                                                                                                                                                                                                                                                                                                                                                                                                                                                                                                                                     |
| Infectious pathogens                                                                         |                                                                                                                                                                                                                                                                                                                                                                                                                                                                                                                                                                                                                                     |
| <b>Bacterial</b>                                                                             | A00–A05, A403, A20–A28, A32–A40, A410–A415, A42–A57, A65–A79, B95–B97, G00, G01, G042, G050, H000, H010, H105, H600–H603, H620, H651, H66, H670, H70, H750, I320, I410, I520, I980, J020, J030, J051, J13–J15, J160, J170, J200–J202, J340, J36, J390–J391, K113, K122, K670–K672, K800, K801, K803–K804, K810, K830, L00–L03, L05, L080, L081, M00, M010, M013, M491, M492, M630, M726, N136, N300, N410, N412, N413                                                                                                                                                                                                               |
| <b>Viral</b>                                                                                 | A08, A60, A80–A99, B00, B02, B05, B06, B08, B09, B15–B27, B30, B33–B34, G020, G041, G051, H191, H621, H671, I411, J050, J09–J12, J171, J203–J207, J21, K2380, K8700, K93820, M014, M015                                                                                                                                                                                                                                                                                                                                                                                                                                             |
| <b>Others</b>                                                                                | B35–B49, B59, G021, H622, J172, M016<br>A06, A07, A59, B50–B58, B60, B64–B83, B87, H030, H061, H130, J173, M012, M631<br>A15–A19, A30, A31, K230, K673, K930, M011, M490, M900, N330, N740, N741<br>A090, A418–A419, B99, G028, G040, G048–G049, G052–G058, G06–G07, H031, H131, H192, H220, H623, H680, I301, I321, I330, I400, I412, I521, J00–J01, J028–J029, J038–J039, J06, J168, J178, J18, J208–J209, J22, J85–J86, K750, L04, L088–L089, L303, M018, M462–M463, M465, M493, M600, M632, M650–M651, M86, M901–M902, N10, N390, N700, N710, N72, N733, N771, P378–P379, P39, R572, R650–R651, T826–T827, T845–T847, T857, U04 |

**eTable 2. List of codes used to identify maternal comorbidities**

|                               |                                                                                                                                                                                                                                                                                                                                                                                                                                                                                                                                                                                                                                                                                                                                                                                                                                                                                                                                                                                                 |
|-------------------------------|-------------------------------------------------------------------------------------------------------------------------------------------------------------------------------------------------------------------------------------------------------------------------------------------------------------------------------------------------------------------------------------------------------------------------------------------------------------------------------------------------------------------------------------------------------------------------------------------------------------------------------------------------------------------------------------------------------------------------------------------------------------------------------------------------------------------------------------------------------------------------------------------------------------------------------------------------------------------------------------------------|
| Diabetes                      |                                                                                                                                                                                                                                                                                                                                                                                                                                                                                                                                                                                                                                                                                                                                                                                                                                                                                                                                                                                                 |
| ICD codes                     | E10-E14, O24                                                                                                                                                                                                                                                                                                                                                                                                                                                                                                                                                                                                                                                                                                                                                                                                                                                                                                                                                                                    |
| ATC codes                     | A10 (excluding A10BX06)                                                                                                                                                                                                                                                                                                                                                                                                                                                                                                                                                                                                                                                                                                                                                                                                                                                                                                                                                                         |
| Obesity                       |                                                                                                                                                                                                                                                                                                                                                                                                                                                                                                                                                                                                                                                                                                                                                                                                                                                                                                                                                                                                 |
| ICD codes                     | E66                                                                                                                                                                                                                                                                                                                                                                                                                                                                                                                                                                                                                                                                                                                                                                                                                                                                                                                                                                                             |
| Hypertension                  |                                                                                                                                                                                                                                                                                                                                                                                                                                                                                                                                                                                                                                                                                                                                                                                                                                                                                                                                                                                                 |
| ICD codes                     | I10-I13, I15, O10-O13, O14-O16                                                                                                                                                                                                                                                                                                                                                                                                                                                                                                                                                                                                                                                                                                                                                                                                                                                                                                                                                                  |
| ATC codes                     | C02AB02, C02AC01, C02AC02, C02AC05, C02AC06, C02CA01, C02CA06, C02DC01, C02LA01, C03AA01, C03AA03, C03BA04, C03BA10, C03BA11, C03BX03, C03CA01, C03CA02, C03CA03, C03DA01, C03DB01, C03EA, C03EA01, C03EA04, C07AA02, C07AA03, C07AA05, C07AA06, C07AA12, C07AA15, C07AA16, C07AA23, C07AB02, C07AB03, C07AB04, C07AB05, C07AB07, C07AB08, C07AB12, C07AG01, C07BA02, C07BB02, C07BB03, C07BB07, C07BB12, C07CA03, C07DA06, C07FB02, C07FB03, C08CA01, C08CA02, C08CA03, C08CA04, C08CA05, C08CA08, C08CA09, C08CA11, C08CA13, C08CX01, C08DA01, C08DB01, C08GA02, C09AA01, C09AA02, C09AA03, C09AA04, C09AA05, C09AA06, C09AA07, C09AA08, C09AA09, C09AA10, C09AA13, C09AA15, C09AA16, C09BA01, C09BA02, C09BA03, C09BA04, C09BA05, C09BA06, C09BA07, C09BA09, C09BA15, C09BB02, C09BB04, C09BB10, C09BX02, C09CA01, C09CA02, C09CA03, C09CA04, C09CA06, C09CA07, C09CA08, C09DA01, C09DA02, C09DA03, C09DA04, C09DA06, C09DA07, C09DA08, C09DB01, C09DB02, C09DB04, C09XA02, C09XA52, C10BX03 |
| Alcohol consumption           |                                                                                                                                                                                                                                                                                                                                                                                                                                                                                                                                                                                                                                                                                                                                                                                                                                                                                                                                                                                                 |
| ICD codes                     | E244, F10, G312, G621, G721, I426, K292, K70, K852, K860, R780, T506, T510, X45, X65, Y15, Y573, Y90, Y91, Z502, Z714, Z721                                                                                                                                                                                                                                                                                                                                                                                                                                                                                                                                                                                                                                                                                                                                                                                                                                                                     |
| ATC codes                     | N07BB                                                                                                                                                                                                                                                                                                                                                                                                                                                                                                                                                                                                                                                                                                                                                                                                                                                                                                                                                                                           |
| Tobacco consumption           |                                                                                                                                                                                                                                                                                                                                                                                                                                                                                                                                                                                                                                                                                                                                                                                                                                                                                                                                                                                                 |
| ICD codes                     | F17, T652, Z587, Z716, Z720, J41-J44                                                                                                                                                                                                                                                                                                                                                                                                                                                                                                                                                                                                                                                                                                                                                                                                                                                                                                                                                            |
| ATC codes                     | N07BA, N06AX12                                                                                                                                                                                                                                                                                                                                                                                                                                                                                                                                                                                                                                                                                                                                                                                                                                                                                                                                                                                  |
| Illicit substance consumption |                                                                                                                                                                                                                                                                                                                                                                                                                                                                                                                                                                                                                                                                                                                                                                                                                                                                                                                                                                                                 |
| ICD codes                     | F11-F16, F18, F19, R781-R785, T40, X62, Y12, Z722                                                                                                                                                                                                                                                                                                                                                                                                                                                                                                                                                                                                                                                                                                                                                                                                                                                                                                                                               |
| ATC codes                     | N07BC01, N07BC02, N07BC51                                                                                                                                                                                                                                                                                                                                                                                                                                                                                                                                                                                                                                                                                                                                                                                                                                                                                                                                                                       |

**eTable 3. List of codes used to identify child comorbidities and drug exposures**

|                                                                                                              |                                                                                                                                                                                                                                                                                                         |
|--------------------------------------------------------------------------------------------------------------|---------------------------------------------------------------------------------------------------------------------------------------------------------------------------------------------------------------------------------------------------------------------------------------------------------|
| Chronic respiratory diseases including major congenital airway malformations                                 |                                                                                                                                                                                                                                                                                                         |
| ICD codes                                                                                                    | J40-J47, J961, J98, E84, Q300, Q321, Q323, Q324, Q330, Q332, Q333, Q334, Q335, Q336, Q338, Q339, Q34                                                                                                                                                                                                    |
| ATC codes                                                                                                    | R03                                                                                                                                                                                                                                                                                                     |
| Neurological or degenerative diseases including major congenital malformations of the nervous system         |                                                                                                                                                                                                                                                                                                         |
| ICD codes                                                                                                    | G35, G82, G70-G73, G40, G41, Q04-Q07                                                                                                                                                                                                                                                                    |
| ATC codes                                                                                                    | L03AB07, L03AB08, L03AB13, L03AX13, L04AA23, L04AA27, L04AA31, N07XX07, N07XX09                                                                                                                                                                                                                         |
| Diabetes                                                                                                     |                                                                                                                                                                                                                                                                                                         |
| ICD codes                                                                                                    | E10-E14                                                                                                                                                                                                                                                                                                 |
| ATC codes                                                                                                    | A10 (excluding A10BX06)                                                                                                                                                                                                                                                                                 |
| Obesity                                                                                                      |                                                                                                                                                                                                                                                                                                         |
| ICD codes                                                                                                    | E66                                                                                                                                                                                                                                                                                                     |
| Liver diseases including major congenital liver malformations                                                |                                                                                                                                                                                                                                                                                                         |
| ICD codes                                                                                                    | K70-K76, Q446, Q447                                                                                                                                                                                                                                                                                     |
| Chronic kidney diseases and major congenital malformations of the urinary system                             |                                                                                                                                                                                                                                                                                                         |
| ICD codes                                                                                                    | N18, Z992, Q60, Q611-Q615, Q618-Q626, Q628, Q630-Q632, Q638, Q639, Q64                                                                                                                                                                                                                                  |
| CCAM codes                                                                                                   | JVJB001, JVJF004, JVJF008, JVRP004, JVRP007, JVRP008, YYYYY007                                                                                                                                                                                                                                          |
| Cardiovascular diseases including major congenital heart defects                                             |                                                                                                                                                                                                                                                                                                         |
| ICD codes                                                                                                    | I01, I05-I09, I11, I13, I20-I25, I27, I30-I45, I47-I52, I65, I66, I71, I72, I77-I83, I87, I95, I99, Z994, Q20-Q25, Q260, Q262-Q266, Q268, Q269                                                                                                                                                          |
| Indications for PPI                                                                                          |                                                                                                                                                                                                                                                                                                         |
| ICD codes                                                                                                    |                                                                                                                                                                                                                                                                                                         |
| Autoimmune diseases or other sources of potential immunosuppression and major congenital chromosomal defects |                                                                                                                                                                                                                                                                                                         |
| ICD codes                                                                                                    | Cancers: C00-C97, D00-D09, Z510, Z511<br>MICI: K50, K51                                                                                                                                                                                                                                                 |
|                                                                                                              | Rheumatoid arthritis and related diseases: M05, M06, M08 (excluding M081), M09                                                                                                                                                                                                                          |
|                                                                                                              | Ankylosing spondylitis and related diseases: M07 (excluding M074, M075), M081, M45, M46                                                                                                                                                                                                                 |
|                                                                                                              | Other chronic inflammatory diseases: L93, L94, M30-M36                                                                                                                                                                                                                                                  |
|                                                                                                              | Inherited metabolic disorders or amyloidosis:<br>Hospital diagnosis: D510-D512, D552, D740, E071, E250, E700-E703, E710, E711, E713, E720-E725, E728, E730, E740-E744, E748, E750-E752, E754, E755, E760, E761, E762, E770, E771, E778, E786, E800, E801, E803, E805, E806, E830-E832, G601, Q773, Q871 |

|                                                                               |                                                                                                                                                                                                                                               |
|-------------------------------------------------------------------------------|-----------------------------------------------------------------------------------------------------------------------------------------------------------------------------------------------------------------------------------------------|
|                                                                               | LTD: E85, D51, D53, D55, D74, E07, E13, E20, E25, E53, E56, E58, E70-E79, E80, E83, E88, G60, G71, H47, H49, Q77, Q87                                                                                                                         |
|                                                                               | Haemophilia:<br>Hospital diagnosis: D66, D67<br>LTD: D66-D69                                                                                                                                                                                  |
|                                                                               | Psoriasis: L40                                                                                                                                                                                                                                |
|                                                                               | Sarcoidosis: D86                                                                                                                                                                                                                              |
|                                                                               | Dermatomyositis: M608, M609, G724                                                                                                                                                                                                             |
|                                                                               | Relapsing polychondritis: M941                                                                                                                                                                                                                |
|                                                                               | Interstitial and deep keratitis: H163, H518                                                                                                                                                                                                   |
|                                                                               | Certain disorders involving the immune mechanism: D80-D84, D86, D89                                                                                                                                                                           |
|                                                                               | Asplenia/ Hyposplenism: Q890, D730                                                                                                                                                                                                            |
|                                                                               | Q90-Q92, Q930-Q935, Q937-Q939, Q96-Q99                                                                                                                                                                                                        |
| ATC codes                                                                     | Immunosuppressants: L04<br>Antipsoriatics for topical use: D05AX02, D05AX03, D05AX04, D05AX05, D05AX52                                                                                                                                        |
| CCAM codes                                                                    | Transplantation: DZEA001, DZEA002, DZEA003, DZEA004, HLEA001, HLEA002, GFEA001, GFEA002, GFEA003, GFEA004, GFEA005, GFEA006, GFEA007, HGEA002, HGEA004, HGEA005, HNEA002, HNEA900, JAEA003<br>Splenectomy: FFFA001, FFFA002, FFFC001, FFFC420 |
| Digestive diseases including congenital malformations of the digestive system |                                                                                                                                                                                                                                               |
| ICD codes                                                                     | B980, E164, K20-K23, K25-K28-K31, K44, K92, R101, R12, P920, P921, P928, P929, F982, Q380, Q383-Q388, Q39, Q40-Q45, Q790                                                                                                                      |
| Corticosteroids                                                               |                                                                                                                                                                                                                                               |
| ATC codes                                                                     | H02AB                                                                                                                                                                                                                                         |
| NSAID                                                                         |                                                                                                                                                                                                                                               |
| ATC codes                                                                     | M01A                                                                                                                                                                                                                                          |

CCAM: French coding system of surgical procedures ("Classification Commune des Actes Médicaux")  
LTD: long-term disease

**eTable 4. List of ICD-10 codes used to identify traumatic injuries, excluding fractures**

|                      |                                                                            |
|----------------------|----------------------------------------------------------------------------|
| Traumatic injury     |                                                                            |
| ICD codes            | V01-V99, W00-W99, X00-X59                                                  |
| Fractures (excluded) |                                                                            |
| ICD codes            | S02, S12, S22, S32, S42, S52, S62, S72, S82, S92, T02, T08, T10, T12, T142 |

**eTable 5. Description of the study population at baseline**

|                                                        | All<br>(n=1,262,424) | Received PPIs during<br>follow-up<br>(n=606,645) | Did not receive PPIs<br>during follow-up<br>(n=655,779) | ASD    |
|--------------------------------------------------------|----------------------|--------------------------------------------------|---------------------------------------------------------|--------|
| <b>Sociodemographic characteristics, No. (%)</b>       |                      |                                                  |                                                         |        |
| Age at index date, median [IQR], days                  | 84 (44-210)          | 88 (44-282)                                      | 82 (44-172)                                             | 0.224  |
| Male                                                   | 666,306 (52.8)       | 323,852 (53.4)                                   | 342,454 (52.2)                                          | 0.023  |
| CMUC                                                   | 115,583 (9.2)        | 46,325 (7.6)                                     | 69,258 (10.6)                                           | -0.102 |
| Deprivation index                                      |                      |                                                  |                                                         | 0.230  |
| 1 (least deprived)                                     | 279,614 (22.2)       | 162,061 (26.7)                                   | 117,553 (17.9)                                          |        |
| 2                                                      | 256,927 (20.4)       | 124,780 (20.6)                                   | 132,147 (20.2)                                          |        |
| 3                                                      | 234,426 (18.6)       | 104,563 (17.2)                                   | 129,863 (19.8)                                          |        |
| 4                                                      | 221,451 (17.5)       | 97,812 (16.1)                                    | 123,639 (18.9)                                          |        |
| 5 (most deprived)                                      | 231,219 (18.3)       | 99,107 (16.3)                                    | 132,112 (20.2)                                          |        |
| Missing                                                | 38,787 (3.1)         | 18,322 (3.0)                                     | 20,465 (3.1)                                            |        |
| Urban unit                                             |                      |                                                  |                                                         | 0.142  |
| ≥200,000 inhabitants                                   | 598,855 (47.4)       | 310,067 (51.1)                                   | 288,788 (44.0)                                          |        |
| 50,000-199,999 inhabitants                             | 153,888 (12.2)       | 69,943 (11.5)                                    | 83,945 (12.8)                                           |        |
| 10,000-49,999 inhabitants                              | 121,914 (9.7)        | 55,375 (9.1)                                     | 66,539 (10.2)                                           |        |
| 2,000 à 9,999 inhabitants                              | 140,659 (11.1)       | 62,930 (10.4)                                    | 77,729 (11.9)                                           |        |
| Outside urban unit                                     | 219,151 (17.4)       | 96,245 (15.9)                                    | 122,906 (18.7)                                          |        |
| Missing                                                | 27,957 (2.2)         | 12,085 (2.0)                                     | 15,872 (2.4)                                            |        |
| <b>Pregnancy and delivery characteristics, No. (%)</b> |                      |                                                  |                                                         |        |
| Maternal age at start of pregnancy                     |                      |                                                  |                                                         |        |
| Median [IQR]                                           | 29 (26-33)           | 30 (26-33)                                       | 29 (26-33)                                              | 0.104  |
| ≥35 years old                                          | 204,442 (16.2)       | 103,341 (17.0)                                   | 101,101 (15.4)                                          | 0.044  |
| Assisted reproductive technology                       | 43,923 (3.5)         | 23,119 (3.8)                                     | 20,804 (3.2)                                            | 0.035  |
| Maternity status                                       |                      |                                                  |                                                         | 0.041  |
| Public                                                 | 809,006 (64.1)       | 382,494 (63.1)                                   | 426,512 (65.0)                                          |        |
| Private                                                | 452,615 (35.9)       | 223,750 (36.9)                                   | 228,865 (34.9)                                          |        |
| Missing                                                | 803 (0.1)            | 401 (0.1)                                        | 402 (0.1)                                               |        |
| Mode of delivery                                       |                      |                                                  |                                                         | 0.037  |
| Vaginal                                                | 997,980 (79.1)       | 474,852 (78.3)                                   | 523,128 (79.8)                                          |        |
| Caesarean                                              | 263,479 (20.9)       | 131,324 (21.6)                                   | 132,155 (20.2)                                          |        |
| Missing                                                | 965 (0.1)            | 469 (0.1)                                        | 496 (0.1)                                               |        |
| Gestational age                                        |                      |                                                  |                                                         | 0.058  |
| Full-term                                              | 1,175,831 (93.1)     | 560,990 (92.5)                                   | 614,841 (93.8)                                          |        |
| Preterm:                                               | 86,593 (6.9)         | 45 655 (7.5)                                     | 40,938 (6.2)                                            |        |
| Moderate to late preterm                               | 78,099 (6.2)         | 40,513 (6.7)                                     | 37,586 (5.7)                                            |        |

|                                                                  | All<br>(n=1,262,424) | Received PPIs during<br>follow-up<br>(n=606,645) | Did not receive PPIs<br>during follow-up<br>(n=655,779) | ASD    |
|------------------------------------------------------------------|----------------------|--------------------------------------------------|---------------------------------------------------------|--------|
| Very preterm                                                     | 7,181 (0.6)          | 4,302 (0.7)                                      | 2,879 (0.4)                                             |        |
| Extremely preterm                                                | 1,313 (0.1)          | 840 (0.1)                                        | 473 (0.1)                                               |        |
| Birth weight                                                     |                      |                                                  |                                                         | 0.018  |
| Severe macrosomia                                                | 53,340 (4.2)         | 25,692 (4.2)                                     | 27,648 (4.2)                                            |        |
| Macrosomia                                                       | 79,541 (6.3)         | 38,025 (6.3)                                     | 41,516 (6.3)                                            |        |
| Normal weight                                                    | 941,279 (74.6)       | 450,899 (74.3)                                   | 490,380 (74.8)                                          |        |
| Small weight                                                     | 94,769 (7.5)         | 45,740 (7.5)                                     | 49,029 (7.5)                                            |        |
| Severe low weight                                                | 51,576 (4.1)         | 25,823 (4.3)                                     | 25,753 (3.9)                                            |        |
| Missing                                                          | 41 919 (3.3)         | 20,466 (3.4)                                     | 21,453 (3.3)                                            |        |
| Maternal comorbidities, No. (%)                                  |                      |                                                  |                                                         |        |
| Diabetes                                                         | 118,910 (9.4)        | 57,398 (9.5)                                     | 61,512 (9.4)                                            | 0.003  |
| Hypertension                                                     | 71,242 (5.6)         | 36,502 (6.0)                                     | 34,740 (5.3)                                            | 0.031  |
| Obesity                                                          | 67,802 (5.4)         | 30,698 (5.1)                                     | 37,104 (5.7)                                            | -0.027 |
| Consumption of tobacco                                           | 63,999 (5.1)         | 27,874 (4.6)                                     | 36,125 (5.5)                                            | -0.042 |
| Consumption of alcohol                                           | 920 (0.1)            | 419 (0.1)                                        | 501 (0.1)                                               | -0.003 |
| Consumption of illicit substances                                | 3,782 (0.3)          | 1,614 (0.3)                                      | 2,168 (0.3)                                             | -0.012 |
| Child comorbidities and drug exposures at index date,<br>No. (%) |                      |                                                  |                                                         |        |
| Respiratory diseases                                             | 72,608 (5.8)         | 48,972 (8.1)                                     | 23,636 (3.6)                                            | 0.191  |
| Neurological diseases                                            | 3,870 (0.3)          | 2,705 (0.5)                                      | 1,165 (0.2)                                             | 0.048  |
| Diabetes                                                         | 133 (0.0)            | 80 (0.0)                                         | 53 (0.0)                                                | 0.005  |
| Obesity                                                          | 127 (0.0)            | 86 (0.0)                                         | 41 (0.0)                                                | 0.008  |
| Liver diseases                                                   | 477 (0.0)            | 345 (0.1)                                        | 132 (0.0)                                               | 0.019  |
| Chronic kidney diseases                                          | 5,452 (0.4)          | 2,724 (0.5)                                      | 2,728 (0.4)                                             | 0.005  |
| Cardiovascular diseases                                          | 12,726 (1.0)         | 7,678 (1.3)                                      | 5,048 (0.8)                                             | 0.049  |
| Immunosuppression                                                | 6,081 (0.5)          | 4,599 (0.8)                                      | 1,482 (0.2)                                             | 0.076  |
| Digestive diseases                                               | 63,227 (5.0)         | 39,497 (6.5)                                     | 23,730 (3.6)                                            | 0.132  |
| Chronic corticosteroid treatment                                 | 59,424 (4.7)         | 40,251 (6.6)                                     | 19,173 (2.9)                                            | 0.175  |
| NSAID treatment                                                  | 44,313 (3.5)         | 28,034 (4.6)                                     | 16,279 (2.5)                                            | 0.198  |
| Healthcare use, No. (%)                                          |                      |                                                  |                                                         |        |
| In mothers                                                       |                      |                                                  |                                                         |        |
| ≥3 preventive drugs dispensed during pregnancy                   | 769,941 (61.0)       | 374,016 (61.7)                                   | 395,925 (60.4)                                          | 0.026  |
| In children, within 3 months before index date                   |                      |                                                  |                                                         |        |
| ≥2 outpatient visits, all medical specialties                    | 947,024 (75.0)       | 454,960 (75.0)                                   | 492,064 (75.0)                                          | 0.001  |
| ≥2 pediatric outpatient visits                                   | 417,040 (33.0)       | 216,583 (35.7)                                   | 200,457 (30.6)                                          | 0.109  |
| ≥2 drug dispensings                                              | 740,464 (58.7)       | 355,287 (58.6)                                   | 385,177 (58.7)                                          | 0.004  |
| ≥1 hospital stays                                                | 82,723 (6.6)         | 51,581 (8.5)                                     | 31,142 (4.8)                                            | 0.151  |

Abbreviations: ASD, absolute standardized differences; CMUC, complementary universal health insurance; NSAID, nonsteroidal anti-inflammatory drug; PPI, proton pump inhibitor.



**eTable 6. Overall risk of serious infections associated with covariates**

|                                               | Crude HR<br>(95% CI) | aHR <sup>a</sup><br>(95% CI) |
|-----------------------------------------------|----------------------|------------------------------|
| Serious infections, overall                   |                      |                              |
| <b>Sociodemographic characteristics</b>       |                      |                              |
| Age at index date                             |                      |                              |
| <1 year                                       | 1 (Ref.)             | 1 (Ref.)                     |
| ≥1 year                                       | 1.14 (1.11-1.17)     | 1.07 (1.05-1.10)             |
| Sex                                           |                      |                              |
| Females                                       | 1 (Ref.)             | 1 (Ref.)                     |
| Males                                         | 1.06 (1.05-1.07)     | 1.03 (1.02-1.04)             |
| CMUC                                          |                      |                              |
| No                                            | 1 (Ref.)             | 1 (Ref.)                     |
| Yes                                           | 1.38 (1.36-1.40)     | 1.22 (1.20-1.24)             |
| Deprivation index                             |                      |                              |
| 1 (least deprived)                            | 1 (Ref.)             | 1 (Ref.)                     |
| 2                                             | 1.17 (1.15-1.19)     | 1.10 (1.08-1.12)             |
| 3                                             | 1.31 (1.29-1.33)     | 1.17 (1.15-1.19)             |
| 4                                             | 1.42 (1.39-1.44)     | 1.21 (1.19-1.23)             |
| 5 (most deprived)                             | 1.60 (1.57-1.62)     | 1.33 (1.30-1.35)             |
| Urban unit                                    |                      |                              |
| ≥200,000 inhabitants                          | 1 (Ref.)             | 1 (Ref.)                     |
| 50,000-199,999 inhabitants                    | 1.31 (1.29-1.33)     | 1.15 (1.14-1.17)             |
| 10,000-49,999 inhabitants                     | 1.44 (1.42-1.46)     | 1.24 (1.22-1.27)             |
| 2,000 à 9,999 inhabitants                     | 1.17 (1.15-1.19)     | 1.06 (1.04-1.08)             |
| Outside urban unit                            | 1.20 (1.06-1.14)     | 1.09 (1.08-1.11)             |
| <b>Pregnancy and delivery characteristics</b> |                      |                              |
| Maternal age at start of pregnancy            |                      |                              |
| <35 years                                     | 1 (Ref.)             | 1 (Ref.)                     |
| ≥35 years                                     | 0.85 (0.83-0.86)     | 0.86 (0.85-0.87)             |
| Assisted reproductive technology              |                      |                              |
| No                                            | 1 (Ref.)             | 1 (Ref.)                     |
| Yes                                           | 0.98 (0.95-1.01)     | 1.01 (0.98-1.03)             |
| Maternity status                              |                      |                              |
| Public                                        | 1 (Ref.)             | 1 (Ref.)                     |
| Private                                       | 0.75 (0.74-0.76)     | 0.84 (0.83-0.85)             |
| Mode of delivery                              |                      |                              |

|                                                         | Crude HR<br>(95% CI) | aHR <sup>a</sup><br>(95% CI) |
|---------------------------------------------------------|----------------------|------------------------------|
| Vaginal                                                 |                      | 1 (Ref.)                     |
| Caesarean                                               | 1.13 (1.12-1.15)     | 1.07 (1.06-1.09)             |
| Gestational age                                         |                      |                              |
| Full-term                                               | 1 (Ref.)             | 1 (Ref.)                     |
| Moderate to late preterm                                | 1.34 (1.31-1.36)     | 1.17 (1.15-1.19)             |
| Very preterm                                            | 2.04 (1.95-2.15)     | 1.37 (1.30-1.44)             |
| Extremely preterm                                       | 3.10 (2.80-3.43)     | 1.92 (1.73-2.13)             |
| Birth weight                                            |                      |                              |
| Normal weight                                           | 1 (Ref.)             | 1 (Ref.)                     |
| Severe macrosomia                                       | 0.96 (0.94-0.98)     | 0.95 (0.93-0.98)             |
| Macrosomia                                              | 1.00 (0.98-1.03)     | 0.95 (0.93-0.97)             |
| Small weight                                            | 1.12 (1.10-1.14)     | 1.07 (1.05-1.09)             |
| Severe low weight                                       | 1.31 (1.28-1.34)     | 1.11 (1.09-1.14)             |
| <b>Maternal comorbidities</b>                           |                      |                              |
| Diabetes                                                |                      |                              |
| No                                                      | 1 (Ref.)             | 1 (Ref.)                     |
| Yes                                                     | 1.07 (1.05-1.09)     | 1.02 (1.00-1.04)             |
| Hypertension                                            |                      |                              |
| No                                                      | 1 (Ref.)             | 1 (Ref.)                     |
| Yes                                                     | 1.23 (1.21-1.25)     | 1.10 (1.08-1.12)             |
| Obesity                                                 |                      |                              |
| No                                                      | 1 (Ref.)             | 1 (Ref.)                     |
| Yes                                                     | 1.25 (1.23-1.28)     | 1.10 (1.07-1.12)             |
| Tobacco consumption                                     |                      |                              |
| No                                                      | 1 (Ref.)             | 1 (Ref.)                     |
| Yes                                                     | 1.25 (1.23-1.28)     | 1.09 (1.07-1.11)             |
| Alcohol consumption                                     |                      |                              |
| No                                                      | 1 (Ref.)             | 1 (Ref.)                     |
| Yes                                                     | 1.33 (1.13-1.57)     | 1.04 (0.88-1.23)             |
| Illicit substance consumption                           |                      |                              |
| No                                                      | 1 (Ref.)             | 1 (Ref.)                     |
| Yes                                                     | 1.15 (1.05-1.26)     | 0.88 (0.81-0.97)             |
| <b>Child comorbidities and drug exposures over time</b> |                      |                              |
| Respiratory diseases                                    |                      |                              |
| No                                                      | 1 (Ref.)             | 1 (Ref.)                     |
| Yes                                                     | 1.44 (1.42-1.46)     | 1.26 (1.24-1.28)             |

|                                                            | Crude HR<br>(95% CI) | aHR <sup>a</sup><br>(95% CI) |
|------------------------------------------------------------|----------------------|------------------------------|
| <b>Neurological diseases</b>                               |                      |                              |
| No                                                         | 1 (Ref.)             | 1 (Ref.)                     |
| Yes                                                        | 2.79 (2.67-2.92)     | 1.86 (1.77-1.94)             |
| <b>Diabetes</b>                                            |                      |                              |
| No                                                         | 1 (Ref.)             | 1 (Ref.)                     |
| Yes                                                        | 3.29 (2.71-3.99)     | 2.68 (2.21-3.25)             |
| <b>Obesity</b>                                             |                      |                              |
| No                                                         | 1 (Ref.)             | 1 (Ref.)                     |
| Yes                                                        | 2.52 (1.95-3.27)     | 0.72 (0.56-0.94)             |
| <b>Liver diseases</b>                                      |                      |                              |
| No                                                         | 1 (Ref.)             | 1 (Ref.)                     |
| Yes                                                        | 3.68 (3.26-4.15)     | 1.73 (1.53-1.95)             |
| <b>Chronic kidney diseases</b>                             |                      |                              |
| No                                                         | 1 (Ref.)             | 1 (Ref.)                     |
| Yes                                                        | 2.05 (1.94-2.16)     | 1.72 (1.63-1.81)             |
| <b>Cardiovascular diseases</b>                             |                      |                              |
| No                                                         | 1 (Ref.)             | 1 (Ref.)                     |
| Yes                                                        | 2.19 (2.11-2.26)     | 1.40 (1.35-1.45)             |
| <b>Immunosuppression</b>                                   |                      |                              |
| No                                                         | 1 (Ref.)             | 1 (Ref.)                     |
| Yes                                                        | 3.57 (3.44-3.71)     | 2.46 (2.36-2.56)             |
| <b>Digestive diseases</b>                                  |                      |                              |
| No                                                         | 1 (Ref.)             | 1 (Ref.)                     |
| Yes                                                        | 1.65 (1.62-1.67)     | 1.27 (1.25-1.29)             |
| <b>Chronic corticosteroid treatment</b>                    |                      |                              |
| No                                                         | 1 (Ref.)             | 1 (Ref.)                     |
| Yes                                                        | 1.42 (1.40-1.45)     | 1.21 (1.19-1.23)             |
| <b>NSAID treatment</b>                                     |                      |                              |
| No                                                         | 1 (Ref.)             | 1 (Ref.)                     |
| Yes                                                        | 1.48 (1.46-1.49)     | 1.40 (1.38-1.41)             |
| <b>Healthcare use</b>                                      |                      |                              |
| <b>In mothers</b>                                          |                      |                              |
| Number of dispensings of preventive drugs during pregnancy |                      |                              |
| <3                                                         | 1 (Ref.)             | 1 (Ref.)                     |
| ≥3                                                         | 0.99 (0.98-1.00)     | 1.01 (1.00-1.02)             |

|                                                       | Crude HR<br>(95% CI) | aHR <sup>a</sup><br>(95% CI) |
|-------------------------------------------------------|----------------------|------------------------------|
| <b>In children, within 3 months before index date</b> |                      |                              |
| Number of outpatient visits, all medical specialties  |                      |                              |
| <2                                                    | 1 (Ref.)             | 1 (Ref.)                     |
| ≥2                                                    | 0.92 (0.91-0.93)     | 0.98 (0.97-0.99)             |
| Number of pediatric outpatient visits                 |                      |                              |
| <2                                                    | 1 (Ref.)             | 1 (Ref.)                     |
| ≥2                                                    | 0.86 (0.85-0.87)     | 0.97 (0.96-0.98)             |
| Number of drug dispensings                            |                      |                              |
| <2                                                    | 1 (Ref.)             | 1 (Ref.)                     |
| ≥2                                                    | 1.04 (1.03-1.05)     | 1.04 (1.03-1.05)             |
| Number of hospital stays                              |                      |                              |
| <1                                                    | 1 (Ref.)             | 1 (Ref.)                     |
| ≥1                                                    | 1.64 (1.61-1.66)     | 1.21 (1.18-1.23)             |
| <b>Season over time</b>                               |                      |                              |
| Spring                                                | 1 (Ref.)             | 1 (Ref.)                     |
| Summer                                                | 0.55 (0.54-0.56)     | 0.55 (0.54-0.56)             |
| Fall                                                  | 0.71 (0.70-0.72)     | 0.73 (0.72-0.75)             |
| Winter                                                | 1.16 (1.15-1.18)     | 1.26 (1.24-1.28)             |
| <b>Calendar year at index date</b>                    |                      |                              |
| 2010                                                  | 1 (Ref.)             | 1 (Ref.)                     |
| 2011                                                  | 1.01 (0.99-1.03)     | 1.01 (0.99-1.03)             |
| 2012                                                  | 1.01 (0.99-1.03)     | 1.01 (0.99-1.03)             |
| 2013                                                  | 1.00 (0.98-1.02)     | 1.00 (0.98-1.02)             |
| 2014                                                  | 1.03 (1.01-1.05)     | 1.03 (1.01-1.06)             |
| 2015                                                  | 1.04 (1.01-1.06)     | 1.04 (1.02-1.07)             |
| 2016                                                  | 1.03 (1.00-1.05)     | 1.04 (1.02-1.07)             |
| 2017                                                  | 1.01 (0.98-1.03)     | 1.03 (1.01-1.06)             |
| 2018                                                  | 1.03 (1.00-1.05)     | 1.06 (1.04-1.09)             |
| 2019                                                  | 0.76 (0.73-0.82)     | 0.85 (0.81-0.90)             |

<sup>a</sup>Cox models adjusted for time-fixed covariates, namely sociodemographic characteristics: age at index date, sex, CMUC, deprivation index, size of the urban unit, calendar year at index date; pregnancy and delivery characteristics: maternal age, ART, maternity status, mode of delivery, gestational age, birth weight; maternal comorbidities: diabetes, hypertension, obesity, tobacco, alcohol, and illicit substance consumption; healthcare use in mothers: preventive medications during pregnancy; healthcare use in children: outpatient physician visits, outpatient pediatrician visits, drug dispensings, hospital stays; and for time-varying covariates, namely season, child comorbidities and drug exposures: respiratory diseases, neurological disease, diabetes, obesity, liver diseases, chronic kidney diseases, cardiovascular diseases, immunosuppression, digestive diseases, chronic corticosteroid treatment, NSAID treatment. For each categorical covariate, missing values, if any, were considered as a separate category.

**eTable 7. Overall risk of serious infections associated with history of PPI exposure over time in children, distinguishing past PPI users according to time since PPI treatment withdrawal**

|                                             | No. of events/No. of PY | Incidence rate <sup>a</sup><br>(95% CI) | Crude HR<br>(95% CI) | aHR <sup>b</sup><br>(95% CI) |
|---------------------------------------------|-------------------------|-----------------------------------------|----------------------|------------------------------|
| Serious infections, overall                 |                         |                                         |                      |                              |
| History of PPI exposure over time           |                         |                                         |                      |                              |
| None                                        | 82,545/2,853,971        | 2.89 (2.87-2.91)                        | 1 (Ref.)             | 1 (Ref.)                     |
| Past exposure, withdrawal since >12 months  | 19,027/1,387,163        | 1.37 (1.35-1.39)                        | 1.04 (1.02-1.06)     | 1.03 (1.01-1.05)             |
| Past exposure, withdrawal since 7-12 months | 9,823/264,222           | 3.72 (3.64-3.79)                        | 1.14 (1.11-1.16)     | 1.09 (1.07-1.11)             |
| Past exposure, withdrawal since 4-6 months  | 6,718/145,666           | 4.61 (4.5-4.72)                         | 1.12 (1.09-1.15)     | 1.08 (1.06-1.11)             |
| Past exposure, withdrawal since ≤3 months   | 8,751/159,724           | 5.48 (5.37-5.59)                        | 1.16 (1.13-1.18)     | 1.13 (1.10-1.16)             |
| Ongoing                                     | 25,191/271,874          | 9.27 (9.15-9.38)                        | 1.46 (1.43-1.48)     | 1.37 (1.35-1.39)             |

<sup>a</sup>Per 100 person-years (PY)

<sup>b</sup>Cox models adjusted for time-fixed covariates, namely sociodemographic characteristics: age at index date, sex, CMUC, deprivation index, size of the urban unit, calendar year at index date; pregnancy and delivery characteristics: maternal age, ART, maternity status, mode of delivery, gestational age, birth weight; maternal comorbidities: diabetes, hypertension, obesity, tobacco, alcohol, and illicit substance consumption; healthcare use in mothers: preventive medications during pregnancy; healthcare use in children: outpatient physician visits, outpatient pediatrician visits, drug dispensings, hospital stays; and for time-varying covariates, namely season, child comorbidities and drug exposures: respiratory diseases, neurological disease, diabetes, obesity, liver diseases, chronic kidney diseases, cardiovascular diseases, immunosuppression, digestive diseases, chronic corticosteroid treatment, NSAID treatment. For each categorical covariate, missing values, if any, were considered as a separate category.

**eTable 8. Overall risk of serious infections associated with proton pump inhibitor exposure over time in children, separately in children born very/extremely preterm or with a chronic comorbidity<sup>a</sup>, and in those without any of these conditions at baseline**

|                                                                                                | No. of events/No. of PY | Incidence rates <sup>b</sup><br>(95% CI) | Crude HR<br>(95% CI) | aHR <sup>c</sup><br>(95% CI) |
|------------------------------------------------------------------------------------------------|-------------------------|------------------------------------------|----------------------|------------------------------|
| Serious infections, overall                                                                    |                         |                                          |                      |                              |
| Children with no history of severe prematurity or chronic condition at baseline                |                         |                                          |                      |                              |
| Unexposed                                                                                      | 110,160/4,225,569       | 2.61 (2.59-2.62)                         | 1 (Ref.)             | 1 (Ref.)                     |
| Exposed                                                                                        | 19,654/220,673          | 8.90 (8.78-9.03)                         | 1.35 (1.33-1.37)     | 1.32 (1.30-1.34)             |
| Children born very or extremely preterm or with a chronic comorbidity <sup>a</sup> at baseline |                         |                                          |                      |                              |
| Unexposed                                                                                      | 16,704/585,177          | 2.85 (2.81-2.90)                         | 1 (Ref.)             | 1 (Ref.)                     |
| Exposed                                                                                        | 5,537/51,200            | 10.81 (10.53-11.10)                      | 1.39 (1.35-1.44)     | 1.36 (1.32-1.41)             |

<sup>a</sup>Chronic comorbidities or drug exposure identified at baseline: chronic respiratory diseases, neurological or degenerative diseases, diabetes, obesity, liver diseases, chronic kidney diseases and major congenital malformations of the urinary system, cardiovascular diseases, autoimmune diseases or other sources of potential immunosuppression, digestive diseases, and chronic corticosteroid treatment

<sup>b</sup>Per 100 person-years (PY)

<sup>c</sup>Cox models adjusted for time-fixed covariates, namely sociodemographic characteristics: age at index date, sex, CMUC, deprivation index, size of the urban unit, calendar year at index date; pregnancy and delivery characteristics: maternal age, ART, maternity status, mode of delivery, gestational age, birth weight; maternal comorbidities: diabetes, hypertension, obesity, tobacco, alcohol, and illicit substance consumption; healthcare use in mothers: preventive medications during pregnancy; healthcare use in children: outpatient physician visits, outpatient pediatrician visits, drug dispensings, hospital stays; and for time-varying covariates, namely season, child comorbidities and drug exposures: respiratory diseases, neurological disease, diabetes, obesity, liver diseases, chronic kidney diseases, cardiovascular diseases, immunosuppression, digestive diseases, chronic corticosteroid treatment, NSAID treatment. For each categorical covariate, missing values, if any, were considered as a separate category.

**eTable 9. Overall risk of serious infections associated with PPI exposure over time in children, excluding H2RA users at baseline**

|                             | No. of events/No. of PY | Incidence rate <sup>a</sup><br>(95% CI) | Crude HR<br>(95% CI) | aHR <sup>b</sup><br>(95% CI) |
|-----------------------------|-------------------------|-----------------------------------------|----------------------|------------------------------|
| Serious infections, overall |                         |                                         |                      |                              |
| PPI exposure                |                         |                                         |                      |                              |
| Unexposed                   | 123,791/4,689,249       | 2.64 (2.63-2.65)                        | 1 (Ref.)             | 1 (Ref.)                     |
| Exposed                     | 24,478/263,359          | 9.29 (9.18-9.41)                        | 1.42 (1.39-1.44)     | 1.34 (1.31-1.36)             |

<sup>a</sup>Per 100 person-years (PY)

<sup>b</sup>Cox models adjusted for time-fixed covariates, namely sociodemographic characteristics: age at index date, sex, CMUC, deprivation index, size of the urban unit, calendar year at index date; pregnancy and delivery characteristics: maternal age, ART, maternity status, mode of delivery, gestational age, birth weight; maternal comorbidities: diabetes, hypertension, obesity, tobacco, alcohol, and illicit substance consumption; healthcare use in mothers: preventive medications during pregnancy; healthcare use in children: outpatient physician visits, outpatient pediatrician visits, drug dispensings, hospital stays; and for time-varying covariates, namely season, child comorbidities and drug exposures: respiratory diseases, neurological disease, diabetes, obesity, liver diseases, chronic kidney diseases, cardiovascular diseases, immunosuppression, digestive diseases, chronic corticosteroid treatment, NSAID treatment. For each categorical covariate, missing values, if any, were considered as a separate category.

**eTable 10. Risk of serious infections associated with proton pump inhibitor exposure over time in children, overall, by site and pathogen – Assessment of protopathic bias**

|                                                                                    | No. of events/No. of PY | Incidence rates <sup>a</sup><br>(95% CI) | Crude HR<br>(95% CI) | aHR <sup>b</sup><br>(95% CI) |
|------------------------------------------------------------------------------------|-------------------------|------------------------------------------|----------------------|------------------------------|
| Serious infections, overall                                                        |                         |                                          |                      |                              |
| Variation of the lag time                                                          |                         |                                          |                      |                              |
| 0-day lag                                                                          |                         |                                          |                      |                              |
| Unexposed                                                                          | 137,389/4,853,287       | 2.83 (2.82-2.85)                         | 1 (Reference)        | 1 (Ref.)                     |
| Exposed                                                                            | 36,170/331,197          | 10.92 (10.81-11.03)                      | 1.47 (1.45-1.49)     | 1.39 (1.37-1.40)             |
| 7-day lag                                                                          |                         |                                          |                      |                              |
| Unexposed                                                                          | 133,717/4,843,289       | 2.76 (2.75-2.78)                         | 1 (Ref.)             | 1 (Ref.)                     |
| Exposed                                                                            | 32,523/317,236          | 10.25 (10.14-10.36)                      | 1.45 (1.43-1.47)     | 1.37 (1.35-1.38)             |
| 30-day lag                                                                         |                         |                                          |                      |                              |
| Unexposed                                                                          | 126,864/4,810,746       | 2.64 (2.62-2.65)                         | 1 (Ref.)             | 1 (Ref.)                     |
| Exposed                                                                            | 25,191/271,874          | 9.27 (9.15-9.38)                         | 1.42 (1.40-1.44)     | 1.34 (1.32-1.36)             |
| 60-day lag                                                                         |                         |                                          |                      |                              |
| Unexposed                                                                          | 120,411/4,768,740       | 2.53 (2.51-2.54)                         | 1 (Ref.)             | 1 (Ref.)                     |
| Exposed                                                                            | 18,186/213,675          | 8.51 (8.39-8.64)                         | 1.41 (1.38-1.43)     | 1.32 (1.30-1.35)             |
| Exclusion of children with antibiotic dispensing within 3 months before index date |                         |                                          |                      |                              |
| Unexposed                                                                          | 111,784/4,071,547       | 2.75 (2.73-2.76)                         | 1 (Ref.)             | 1 (Ref.)                     |
| Exposed                                                                            | 22,328/224,977          | 9.92 (9.80-10.06)                        | 1.41 (1.39-1.43)     | 1.34 (1.32-1.36)             |



|                                                                                    | No. of events/No. of PY | Incidence rates <sup>a</sup><br>(95% CI) | Crude HR<br>(95% CI) | aHR <sup>b</sup><br>(95% CI) |
|------------------------------------------------------------------------------------|-------------------------|------------------------------------------|----------------------|------------------------------|
| <b>By infection site</b>                                                           |                         |                                          |                      |                              |
| <b>Digestive tract</b>                                                             |                         |                                          |                      |                              |
| Variation of the lag time                                                          |                         |                                          |                      |                              |
| 0-day lag                                                                          |                         |                                          |                      |                              |
| Unexposed                                                                          | 51,944/5,276,567        | 0.98 (0.98-0.99)                         | 1 (Ref.)             | 1 (Ref.)                     |
| Exposed                                                                            | 12,722/353,863          | 3.60 (3.53-3.66)                         | 1.77 (1.73-1.81)     | 1.67 (1.63-1.70)             |
| 7-day lag                                                                          |                         |                                          |                      |                              |
| Unexposed                                                                          | 51,492/5,267,013        | 0.98 (0.97-0.99)                         | 1 (Ref.)             | 1 (Ref.)                     |
| Exposed                                                                            | 11,539/339,421          | 3.40 (3.34-3.46)                         | 1.69 (1.65-1.73)     | 1.59 (1.56-1.63)             |
| 30-day lag                                                                         |                         |                                          |                      |                              |
| Unexposed                                                                          | 50,608/5,235,608        | 0.97 (0.96-0.98)                         | 1 (Ref.)             | 1 (Ref.)                     |
| Exposed                                                                            | 9,412/292,237           | 3.22 (3.16-3.29)                         | 1.61 (1.57-1.65)     | 1.52 (1.48-1.55)             |
| 60-day lag                                                                         |                         |                                          |                      |                              |
| Unexposed                                                                          | 49,500/5,194,589        | 0.95 (0.94-0.96)                         | 1 (Ref.)             | 1 (Ref.)                     |
| Exposed                                                                            | 7,337/231,267           | 3.17 (3.10-3.25)                         | 1.58 (1.54-1.62)     | 1.49 (1.45-1.53)             |
| Exclusion of children with antibiotic dispensing within 3 months before index date |                         |                                          |                      |                              |
| Unexposed                                                                          | 44,844/4,446,093        | 1.01 (1.0-1.02)                          | 1 (Ref.)             | 1 (Ref.)                     |
| Exposed                                                                            | 8,269/243,174           | 3.40 (3.33-3.47)                         | 1.62 (1.58-1.67)     | 1.54 (1.50-1.58)             |
| <b>ENT sphere</b>                                                                  |                         |                                          |                      |                              |
| Variation of the lag time                                                          |                         |                                          |                      |                              |
| 0-day lag                                                                          |                         |                                          |                      |                              |
| Unexposed                                                                          | 26,144/5,415,669        | 0.48 (0.48-0.49)                         | 1 (Ref.)             | 1 (Ref.)                     |
| Exposed                                                                            | 5,059/361,071           | 1.40 (1.36-1.44)                         | 1.62 (1.57-1.68)     | 1.50 (1.45-1.55)             |
| 7-day lag                                                                          |                         |                                          |                      |                              |
| Unexposed                                                                          | 25,796/5,406,251        | 0.48 (0.47-0.48)                         | 1 (Ref.)             | 1 (Ref.)                     |
| Exposed                                                                            | 4,626/346,485           | 1.34 (1.30-1.37)                         | 1.61 (1.55-1.66)     | 1.48 (1.43-1.53)             |
| 30-day lag                                                                         |                         |                                          |                      |                              |
| Unexposed                                                                          | 25,052/5,375,283        | 0.47 (0.46-0.47)                         | 1 (Ref.)             | 1 (Ref.)                     |
| Exposed                                                                            | 3,700/298,771           | 1.24 (1.20-1.28)                         | 1.60 (1.54-1.66)     | 1.47 (1.41-1.52)             |
| 60-day lag                                                                         |                         |                                          |                      |                              |
| Unexposed                                                                          | 24,505/5,334,794        | 0.46 (0.45-0.47)                         | 1 (Ref.)             | 1 (Ref.)                     |
| Exposed                                                                            | 2,835/237,027           | 1.20 (1.15-1.24)                         | 1.60 (1.54-1.67)     | 1.45 (1.39-1.52)             |
| Exclusion of children with antibiotic dispensing within 3 months before index date |                         |                                          |                      |                              |

|                                                                                    | No. of events/No. of PY | Incidence rates <sup>a</sup><br>(95% CI) | Crude HR<br>(95% CI) | aHR <sup>b</sup><br>(95% CI) |
|------------------------------------------------------------------------------------|-------------------------|------------------------------------------|----------------------|------------------------------|
| Unexposed                                                                          | 21,645/4,571,140        | 0.47 (0.47-0.48)                         | 1 (Ref.)             | 1 (Ref.)                     |
| Exposed                                                                            | 3,086/249,070           | 1.24 (1.20-1.28)                         | 1.57 (1.50-1.63)     | 1.43 (1.38-1.50)             |
| <b>Lower respiratory tract</b>                                                     |                         |                                          |                      |                              |
| Variation of the lag time                                                          |                         |                                          |                      |                              |
| 0-day lag                                                                          |                         |                                          |                      |                              |
| Unexposed                                                                          | 42,737/5,300,957        | 0.81 (0.80-0.81)                         | 1 (Ref.)             | 1 (Ref.)                     |
| Exposed                                                                            | 15,379/351,518          | 4.38 (4.31-4.44)                         | 1.34 (1.32-1.37)     | 1.23 (1.20-1.25)             |
| 7-day lag                                                                          |                         |                                          |                      |                              |
| Unexposed                                                                          | 40,552/5,291,397        | 0.77 (0.76-0.77)                         | 1 (Ref.)             | 1 (Ref.)                     |
| Exposed                                                                            | 13,763/337,096          | 4.08 (4.02-4.15)                         | 1.35 (1.32-1.38)     | 1.22 (1.20-1.25)             |
| 30-day lag                                                                         |                         |                                          |                      |                              |
| Unexposed                                                                          | 36,607/5,260,133        | 0.70 (0.69-0.70)                         | 1 (Ref.)             | 1 (Ref.)                     |
| Exposed                                                                            | 10,446/290,030          | 3.60 (3.53-3.67)                         | 1.35 (1.32-1.39)     | 1.22 (1.19-1.25)             |
| 60-day lag                                                                         |                         |                                          |                      |                              |
| Unexposed                                                                          | 32,905/5,219,529        | 0.63 (0.62-0.64)                         | 1 (Ref.)             | 1 (Ref.)                     |
| Exposed                                                                            | 7,255/229,321           | 3.16 (3.09-3.24)                         | 1.37 (1.33-1.40)     | 1.22 (1.19-1.25)             |
| Exclusion of children with antibiotic dispensing within 3 months before index date |                         |                                          |                      |                              |
| Unexposed                                                                          | 33,038/4,462,550        | 0.74 (0.73-0.75)                         | 1 (Ref.)             | 1 (Ref.)                     |
| Exposed                                                                            | 9,625/240,899           | 4.0 (3.92-4.08)                          | 1.35 (1.32-1.39)     | 1.22 (1.19-1.25)             |
| <b>Kidneys or urinary tract</b>                                                    |                         |                                          |                      |                              |
| Variation of the lag time                                                          |                         |                                          |                      |                              |
| 0-day lag                                                                          |                         |                                          |                      |                              |
| Unexposed                                                                          | 14,057/5,456,162        | 0.26 (0.25-0.26)                         | 1 (Ref.)             | 1 (Ref.)                     |
| Exposed                                                                            | 3,932/363,101           | 1.08 (1.05-1.12)                         | 1.26 (1.21-1.31)     | 1.22 (1.18-1.27)             |
| 7-day lag                                                                          |                         |                                          |                      |                              |
| Unexposed                                                                          | 13,676/5,446,801        | 0.25 (0.25-0.26)                         | 1 (Ref.)             | 1 (Ref.)                     |
| Exposed                                                                            | 3,610/348,457           | 1.04 (1.0-1.07)                          | 1.26 (1.21-1.31)     | 1.22 (1.17-1.27)             |
| 30-day lag                                                                         |                         |                                          |                      |                              |
| Unexposed                                                                          | 12,826/5,416,027        | 0.24 (0.23-0.24)                         | 1 (Ref.)             | 1 (Ref.)                     |
| Exposed                                                                            | 2,798/300,543           | 0.93 (0.90-0.97)                         | 1.23 (1.18-1.29)     | 1.20 (1.15-1.25)             |
| 60-day lag                                                                         |                         |                                          |                      |                              |
| Unexposed                                                                          | 11,950/5,375,805        | 0.22 (0.22-0.23)                         | 1 (Ref.)             | 1 (Ref.)                     |
| Exposed                                                                            | 1,936/238,536           | 0.81 (0.78-0.85)                         | 1.19 (1.13-1.25)     | 1.16 (1.10-1.22)             |

|                                                                                    | No. of events/No. of PY | Incidence rates <sup>a</sup><br>(95% CI) | Crude HR<br>(95% CI) | aHR <sup>b</sup><br>(95% CI) |
|------------------------------------------------------------------------------------|-------------------------|------------------------------------------|----------------------|------------------------------|
| Exclusion of children with antibiotic dispensing within 3 months before index date |                         |                                          |                      |                              |
| Unexposed                                                                          | 11,462/4,602,952        | 0.25 (0.24-0.25)                         | 1 (Ref.)             | 1 (Ref.)                     |
| Exposed                                                                            | 2,523/250,443           | 1.01 (0.97-1.05)                         | 1.23 (1.17-1.28)     | 1.19 (1.14-1.25)             |
| <b>Skin</b>                                                                        |                         |                                          |                      |                              |
| Variation of the lag time                                                          |                         |                                          |                      |                              |
| 0-day lag                                                                          |                         |                                          |                      |                              |
| Unexposed                                                                          | 6,173/5,509,638         | 0.11 (0.11-0.11)                         | 1 (Ref.)             | 1 (Ref.)                     |
| Exposed                                                                            | 458/366,239             | 0.13 (0.11-0.14)                         | 1.20 (1.08-1.33)     | 1.13 (1.02-1.25)             |
| 7-day lag                                                                          |                         |                                          |                      |                              |
| Unexposed                                                                          | 6,165/5,500,336         | 0.11 (0.11-0.11)                         | 1 (Ref.)             | 1 (Ref.)                     |
| Exposed                                                                            | 420/351,533             | 0.12 (0.11-0.13)                         | 1.15 (1.04-1.28)     | 1.08 (0.98-1.21)             |
| 30-day lag                                                                         |                         |                                          |                      |                              |
| Unexposed                                                                          | 6,127/5,469,711         | 0.11 (0.11-0.11)                         | 1 (Ref.)             | 1 (Ref.)                     |
| Exposed                                                                            | 360/303,384             | 0.12 (0.11-0.13)                         | 1.16 (1.03-1.29)     | 1.08 (0.97-1.21)             |
| 60-day lag                                                                         |                         |                                          |                      |                              |
| Unexposed                                                                          | 6,113/5,429,612         | 0.11 (0.11-0.12)                         | 1 (Ref.)             | 1 (Ref.)                     |
| Exposed                                                                            | 285/241,009             | 0.12 (0.11-0.13)                         | 1.13 (1.0-1.28)      | 1.05 (0.92-1.19)             |
| Exclusion of children with antibiotic dispensing within 3 months before index date |                         |                                          |                      |                              |
| Unexposed                                                                          | 5,109/4,652,561         | 0.11 (0.11-0.11)                         | 1 (Ref.)             | 1 (Ref.)                     |
| Exposed                                                                            | 290/253,053             | 0.11 (0.10-0.13)                         | 1.18 (1.04-1.33)     | 1.10 (0.97-1.25)             |
| <b>Musculoskeletal system</b>                                                      |                         |                                          |                      |                              |
| Variation of the lag time                                                          |                         |                                          |                      |                              |
| 0-day lag                                                                          |                         |                                          |                      |                              |
| Unexposed                                                                          | 2,456/5,520,959         | 0.04 (0.04-0.05)                         | 1 (Ref.)             | 1 (Ref.)                     |
| Exposed                                                                            | 256/366,458             | 0.07 (0.06-0.08)                         | 1.54 (1.35-1.76)     | 1.32 (1.15-1.51)             |
| 7-day lag                                                                          |                         |                                          |                      |                              |
| Unexposed                                                                          | 2,458/5,511,662         | 0.04 (0.04-0.05)                         | 1 (Ref.)             | 1 (Ref.)                     |
| Exposed                                                                            | 239/351,747             | 0.07 (0.06-0.08)                         | 1.48 (1.29-1.70)     | 1.27 (1.10-1.46)             |
| 30-day lag                                                                         |                         |                                          |                      |                              |
| Unexposed                                                                          | 2,473/5,481,052         | 0.05 (0.04-0.05)                         | 1 (Ref.)             | 1 (Ref.)                     |
| Exposed                                                                            | 203/303,579             | 0.07 (0.06-0.08)                         | 1.38 (1.19-1.60)     | 1.17 (1.01-1.37)             |
| 60-day lag                                                                         |                         |                                          |                      |                              |

|                                                                                    | No. of events/No. of PY | Incidence rates <sup>a</sup><br>(95% CI) | Crude HR<br>(95% CI) | aHR <sup>b</sup><br>(95% CI) |
|------------------------------------------------------------------------------------|-------------------------|------------------------------------------|----------------------|------------------------------|
| Unexposed                                                                          | 2,480/5,440,967         | 0.05 (0.04-0.05)                         | 1 (Ref.)             | 1 (Ref.)                     |
| Exposed                                                                            | 164/241,179             | 0.07 (0.06-0.08)                         | 1.30 (1.11-1.53)     | 1.09 (0.93-1.29)             |
| Exclusion of children with antibiotic dispensing within 3 months before index date |                         |                                          |                      |                              |
| Unexposed                                                                          | 2,147/4,661,842         | 0.05 (0.04-0.05)                         | 1 (Ref.)             | 1 (Ref.)                     |
| Exposed                                                                            | 162/253,211             | 0.06 (0.05-0.07)                         | 1.41 (1.19-1.66)     | 1.18 (0.99-1.39)             |
| <b>Nervous system</b>                                                              |                         |                                          |                      |                              |
| Variation of the lag time                                                          |                         |                                          |                      |                              |
| 0-day lag                                                                          |                         |                                          |                      |                              |
| Unexposed                                                                          | 1,998/5,513,452         | 0.04 (0.03-0.04)                         | 1 (Ref.)             | 1 (Ref.)                     |
| Exposed                                                                            | 293/351,607             | 0.08 (0.07-0.09)                         | 1.59 (1.38-1.82)     | 1.44 (1.26-1.64)             |
| 7-day lag                                                                          |                         |                                          |                      |                              |
| Unexposed                                                                          | 1,998/5,513,452         | 0.04 (0.03-0.04)                         | 1 (Ref.)             | 1 (Ref.)                     |
| Exposed                                                                            | 293/351,607             | 0.08 (0.07-0.09)                         | 1.59 (1.38-1.82)     | 1.40 (1.22-1.62)             |
| 30-day lag                                                                         |                         |                                          |                      |                              |
| Unexposed                                                                          | 1,914/5,482,847         | 0.03 (0.03-0.04)                         | 1 (Ref.)             | 1 (Ref.)                     |
| Exposed                                                                            | 200/303,443             | 0.07 (0.06-0.08)                         | 1.50 (1.27-1.76)     | 1.31 (1.11-1.54)             |
| 60-day lag                                                                         |                         |                                          |                      |                              |
| Unexposed                                                                          | 1,861/5,442,775         | 0.03 (0.03-0.04)                         | 1 (Ref.)             | 1 (Ref.)                     |
| Exposed                                                                            | 136/241,051             | 0.06 (0.05-0.07)                         | 1.50 (1.24-1.82)     | 1.28 (1.05-1.55)             |
| Exclusion of children with antibiotic dispensing within 3 months before index date |                         |                                          |                      |                              |
| Unexposed                                                                          | 1,640/4,663,168         | 0.04 (0.03-0.04)                         | 1 (Ref.)             | 1 (Ref.)                     |
| Exposed                                                                            | 170/253,084             | 0.07 (0.06-0.08)                         | 1.44 (1.21-1.73)     | 1.26 (1.05-1.51)             |

|                                                                                    | No. of events/No. of PY | Incidence rates <sup>a</sup><br>(95% CI) | Crude HR<br>(95% CI) | aHR <sup>b</sup><br>(95% CI) |
|------------------------------------------------------------------------------------|-------------------------|------------------------------------------|----------------------|------------------------------|
| <b>By infection pathogen</b>                                                       |                         |                                          |                      |                              |
| <b>Bacterial</b>                                                                   |                         |                                          |                      |                              |
| Variation of the lag time                                                          |                         |                                          |                      |                              |
| 0-day lag                                                                          |                         |                                          |                      |                              |
| Unexposed                                                                          | 25,126/5,426,890        | 0.46 (0.46-0.47)                         | 1 (Ref.)             | 1 (Ref.)                     |
| Exposed                                                                            | 4,074/361,940           | 1.13 (1.09-1.16)                         | 1.82 (1.76-1.89)     | 1.62 (1.56-1.68)             |
| 7-day lag                                                                          |                         |                                          |                      |                              |
| Unexposed                                                                          | 24,943/5,417,493        | 0.46 (0.45-0.47)                         | 1 (Ref.)             | 1 (Ref.)                     |
| Exposed                                                                            | 3,772/347,332           | 1.09 (1.05-1.12)                         | 1.81 (1.74-1.87)     | 1.59 (1.53-1.66)             |
| 30-day lag                                                                         |                         |                                          |                      |                              |
| Unexposed                                                                          | 24,715/5,386,573        | 0.46 (0.45-0.46)                         | 1 (Ref.)             | 1 (Ref.)                     |
| Exposed                                                                            | 3,177/299,527           | 1.06 (1.02-1.10)                         | 1.78 (1.71-1.85)     | 1.56 (1.50-1.63)             |
| 60-day lag                                                                         |                         |                                          |                      |                              |
| Unexposed                                                                          | 24,565/5,346,109        | 0.46 (0.45-0.47)                         | 1 (Ref.)             | 1 (Ref.)                     |
| Exposed                                                                            | 2,546/237,638           | 1.07 (1.03-1.11)                         | 1.75 (1.68-1.83)     | 1.53 (1.46-1.60)             |
| Exclusion of children with antibiotic dispensing within 3 months before index date |                         |                                          |                      |                              |
| Unexposed                                                                          | 21,007/4,582,788        | 0.46 (0.45-0.46)                         | 1 (Ref.)             | 1 (Ref.)                     |
| Exposed                                                                            | 2,554/249,835           | 1.02 (0.98-1.06)                         | 1.74 (1.67-1.82)     | 1.53 (1.47-1.60)             |
| <b>Viral</b>                                                                       |                         |                                          |                      |                              |
| Variation of the lag time                                                          |                         |                                          |                      |                              |
| 0-day lag                                                                          |                         |                                          |                      |                              |
| Unexposed                                                                          | 65,643/5,182,911        | 1.27 (1.26-1.28)                         | 1 (Ref.)             | 1 (Ref.)                     |
| Exposed                                                                            | 21,203/346,244          | 6.12 (6.04-6.21)                         | 1.42 (1.40-1.45)     | 1.35 (1.33-1.37)             |
| 7-day lag                                                                          |                         |                                          |                      |                              |
| Unexposed                                                                          | 63,301/5,173,239        | 1.22 (1.21-1.23)                         | 1 (Ref.)             | 1 (Ref.)                     |
| Exposed                                                                            | 19,002/331,939          | 5.72 (5.64-5.81)                         | 1.40 (1.38-1.43)     | 1.33 (1.30-1.35)             |
| 30-day lag                                                                         |                         |                                          |                      |                              |
| Unexposed                                                                          | 58,833/5,141,632        | 1.14 (1.14-1.15)                         | 1 (Ref.)             | 1 (Ref.)                     |
| Exposed                                                                            | 14,598/285,310          | 5.12 (5.03-5.20)                         | 1.38 (1.36-1.41)     | 1.30 (1.28-1.33)             |
| 60-day lag                                                                         |                         |                                          |                      |                              |
| Unexposed                                                                          | 54,477/5,100,636        | 1.07 (1.06-1.08)                         | 1 (Ref.)             | 1 (Ref.)                     |
| Exposed                                                                            | 10,414/225,248          | 4.62 (4.54-4.71)                         | 1.38 (1.35-1.41)     | 1.30 (1.27-1.33)             |
| Exclusion of children with antibiotic dispensing within 3 months before index date |                         |                                          |                      |                              |

|           | No. of events/No. of PY | Incidence rates <sup>a</sup><br>(95% CI) | Crude HR<br>(95% CI) | aHR <sup>b</sup><br>(95% CI) |
|-----------|-------------------------|------------------------------------------|----------------------|------------------------------|
| Unexposed | 52,910/4,356,888        | 1.21 (1.20-1.22)                         | 1 (Ref.)             | 1 (Ref.)                     |
| Exposed   | 13,326/236,595          | 5.63 (5.54-5.73)                         | 1.39 (1.36-1.42)     | 1.31 (1.28-1.34)             |

<sup>a</sup>Per 100 person-years (PY)

<sup>b</sup>Cox models adjusted for time-fixed covariates, namely sociodemographic characteristics: age at index date, sex, CMUC, deprivation index, size of the urban unit, calendar year at index date; pregnancy and delivery characteristics: maternal age, ART, maternity status, mode of delivery, gestational age, birth weight; maternal comorbidities: diabetes, hypertension, obesity, tobacco, alcohol, and illicit substance consumption; healthcare use in mothers: preventive medications during pregnancy; healthcare use in children: outpatient physician visits, outpatient pediatrician visits, drug dispensings, hospital stays; and for time-varying covariates, namely season, child comorbidities and drug exposures: respiratory diseases, neurological disease, diabetes, obesity, liver diseases, chronic kidney diseases, cardiovascular diseases, immunosuppression, digestive diseases, chronic corticosteroid treatment, NSAID treatment. For each categorical covariate, missing values, if any, were considered as a separate category.

**eTable 11. Risk of serious lower respiratory tract infections in the 30 days before index date according to the treatment initiated at index date (PPI vs. H2RA or antacid/alginate)**

|                                          | No. of events/No. of PY | Incidence rate <sup>a</sup><br>(95% CI) | Crude HR<br>(95% CI) | aHR <sup>b</sup><br>(95% CI) |
|------------------------------------------|-------------------------|-----------------------------------------|----------------------|------------------------------|
| <b>Lower respiratory tract infection</b> |                         |                                         |                      |                              |
| <b>PPI exposure at index date</b>        |                         |                                         |                      |                              |
| No                                       | 7,045/469,349           | 1.50 (1.47-1.54)                        | 1 (Ref.)             | 1 (Ref.)                     |
| Yes                                      | 5,622/524,695           | 1.07 (1.04-1.10)                        | 1.20 (1.16-1.24)     | 0.91 (0.87-0.94)             |

<sup>a</sup>Per 100 person-years (PY)

<sup>b</sup>Cox models adjusted for time-fixed covariates measured at baseline, namely sociodemographic characteristics: age at index date, sex, CMUC, deprivation index, size of the urban unit, calendar year at index date; pregnancy and delivery characteristics: maternal age, ART, maternity status, mode of delivery, gestational age, birth weight; maternal comorbidities: diabetes, hypertension, obesity, tobacco, alcohol, and illicit substance consumption; healthcare use in mothers: preventive medications during pregnancy; healthcare use in children: outpatient physician visits, outpatient pediatrician visits, drug dispensings, hospital stays; season; child comorbidities and drug exposures: respiratory diseases, neurological disease, diabetes, obesity, liver diseases, chronic kidney diseases, cardiovascular diseases, immunosuppression, digestive diseases, chronic corticosteroid treatment, NSAID treatment. For each categorical covariate, missing values, if any, were considered as a separate category.

**eTable 12. E-values calculated for the association between PPI exposure over time and serious infections in children, overall, and by site and pathogen**

|                              | aHR <sup>a</sup> (95% CI) | E-value for the central value of the estimate | E-value for the lower bound of the confidence interval |
|------------------------------|---------------------------|-----------------------------------------------|--------------------------------------------------------|
| Serious infections, overall  | 1.34 (1.32-1.36)          | 2.01                                          | 1.97                                                   |
| <b>By infection site</b>     |                           |                                               |                                                        |
| Digestive tract              | 1.52 (1.48-1.55)          | 2.41                                          | 2.32                                                   |
| ENT sphere                   | 1.47 (1.41-1.52)          | 2.30                                          | 2.17                                                   |
| Lower respiratory tract      | 1.22 (1.19-1.25)          | 1.74                                          | 1.67                                                   |
| Kidneys or urinary tract     | 1.20 (1.15-1.25)          | 1.69                                          | 1.57                                                   |
| Musculoskeletal system       | 1.17 (1.01-1.37)          | 1.62                                          | 1.11                                                   |
| Nervous system               | 1.31 (1.11-1.54)          | 1.95                                          | 1.46                                                   |
| <b>By infection pathogen</b> |                           |                                               |                                                        |
| Bacterial                    | 1.56 (1.50-1.63)          | 2.49                                          | 2.37                                                   |
| Viral                        | 1.30 (1.28-1.33)          | 1.92                                          | 1.88                                                   |

<sup>a</sup>Cox models adjusted for time-fixed covariates, namely sociodemographic characteristics: age at index date, sex, CMUC, deprivation index, size of the urban unit, calendar year at index date; pregnancy and delivery characteristics: maternal age, ART, maternity status, mode of delivery, gestational age, birth weight; maternal comorbidities: diabetes, hypertension, obesity, tobacco, alcohol, and illicit substance consumption; healthcare use in mothers: preventive medications during pregnancy; healthcare use in children: outpatient physician visits, outpatient pediatrician visits, drug dispensings, hospital stays; and for time-varying covariates, namely season, child comorbidities and drug exposures: respiratory diseases, neurological disease, diabetes, obesity, liver diseases, chronic kidney diseases, cardiovascular diseases, immunosuppression, digestive diseases, chronic corticosteroid treatment, NSAID treatment. For each categorical covariate, missing values, if any, were considered as a separate category.
