# Supplementary material for: Proton Pump Inhibitor Use and Risk of Serious Infections in Young Children
Source: PubMed Central journal article supplement (PMC10425862; doi:10.1001/jamapediatrics.2023.2900), 2023-08-14
Supplement: jamapediatr-e232900-s002.pdf [file jamapediatr-e232900-s002.pdf]

## Data Sharing Statement

Lassalle. Proton Pump Inhibitor Use and Risk of Serious Infections in Young Children. *JAMA Pediatr*. Published August 14, 2023. doi:10.1001/jamapediatrics.2023.2900

### Data

**Data available:** No
